# Supplementary material
Source: ML conference proceedings conference paper supplement (https://openreview.net/forum?id=sPLTQSf6GI)
Supplement: supplementary_material [file attachment]

505 **A Mathematical Preliminaries**

506 In this section, we recall some basic facts about measure and probability theory that we need for the  
 507 development in the main body of the paper. We follow Çınlar [11].

508 **A.1 Measure Theory**

509 Suppose that  $E$  is a set. We first define the notion of a  $\sigma$ -algebra. A non-empty collection  $\mathcal{E}$  of  $E$  is  
 510 called a  $\sigma$ -algebra on  $E$  if it is closed under complements and countable unions, that is, if

- 511 (i)  $A \in \mathcal{E} \implies E \setminus A \in \mathcal{E}$ ;  
 512 (ii)  $A_1, A_2, \dots \in \mathcal{E} \implies \bigcup_{n=1}^{\infty} A_n \in \mathcal{E}$

513 [11, p.2]. We call  $\{\emptyset, E\}$  the *trivial  $\sigma$ -algebra* of  $E$ . If  $\mathcal{C}$  is an arbitrary collection of subsets of  $E$ ,  
 514 then the smallest  $\sigma$ -algebra that contains  $\mathcal{C}$ , or equivalently, the intersection of all  $\sigma$ -algebras that  
 515 contain  $\mathcal{C}$ , is called the  *$\sigma$ -algebra generated by  $\mathcal{C}$* , and is denoted  $\sigma\mathcal{C}$ .

516 A *measurable space* is a pair  $(E, \mathcal{E})$ , where  $E$  is a set and  $\mathcal{E}$  is a  $\sigma$ -algebra on  $E$  [11, p.4].

517 Suppose  $(E, \mathcal{E})$  and  $(F, \mathcal{F})$  are measurable spaces. For  $A \in \mathcal{E}$  and  $B \in \mathcal{F}$ , we define the *measurable*  
 518 *rectangle*  $A \times B$  as the set of all pairs  $(x, y)$  with  $x \in A$  and  $y \in B$ . We define the *product  $\sigma$ -algebra*  
 519  $\mathcal{E} \otimes \mathcal{F}$  on  $E \times F$  as the  $\sigma$ -algebra generated by the collection of all measurable rectangles. The  
 520 measurable space  $(E \times F, \mathcal{E} \otimes \mathcal{F})$  is the *product* of  $(E, \mathcal{E})$  and  $(F, \mathcal{F})$  [11, p.4]. More generally, if  
 521  $(E_1, \mathcal{E}_1), \dots, (E_n, \mathcal{E}_n)$  are measurable spaces, their product is

$$\bigotimes_{i=1}^n (E_i, \mathcal{E}_i) = \left( \prod_{i=1}^n E_i, \bigotimes_{i=1}^n \mathcal{E}_i \right),$$

522 where  $E_1 \times \dots \times E_n$  is the set of all  $n$ -tuples  $(x_1, \dots, x_n)$  with  $x_i \in E_i$  for  $i = 1, \dots, n$  and  $\mathcal{E}_1 \otimes \dots \otimes \mathcal{E}_n$   
 523 is the  $\sigma$ -algebra generated by the *measurable rectangles*  $A_1 \times \dots \times A_n$  with  $A_i \in \mathcal{E}_i$  for  $i = 1, \dots, n$   
 524 [11, p.44]. If  $T$  is an arbitrary (countable or uncountable) index set and  $(E_t, \mathcal{E}_t)$  is a measurable  
 525 space for each  $t \in T$ , the *product space* of  $\{E_t : t \in T\}$  is the set  $\prod_{t \in T} E_t$  of all collections  $(x_t)_{t \in T}$   
 526 with  $x_t \in E_t$  for each  $t \in T$ . A rectangle in  $\prod_{t \in T} E_t$  is a subset of the form

$$\prod_{t \in T} A_t = \{x = (x_t)_{t \in T} \in \prod_{t \in T} E_t : x_t \in A_t \text{ for each } t \text{ in } T\}$$

527 where  $A_t$  differs from  $E_t$  for only a finite number of  $t$ . It is said to be measurable if  $A_t \in \mathcal{E}_t$  for  
 528 every  $t$  (for which  $A_t$  differs from  $E_t$ ). The  $\sigma$ -algebra on  $\prod_{t \in T} E_t$  generated by the collection of all  
 529 measurable rectangles is called the *product  $\sigma$ -algebra* and is denoted by  $\bigotimes_{t \in T} \mathcal{E}_t$  [11, p.45].

530 A collection  $\mathcal{C}$  of subsets of  $E$  is called a *p-system* if it is closed under intersections [11, p.2]. If  
 531 two measures  $\mu$  and  $\nu$  on a measurable space  $(E, \mathcal{E})$  with  $\mu(E) = \nu(E) < \infty$  agree on a p-system  
 532 generating  $\mathcal{E}$ , then  $\mu$  and  $\nu$  are identical [11, p.16, Proposition 3.7].

533 Let  $(E, \mathcal{E})$  and  $(F, \mathcal{F})$  be measurable spaces. A mapping  $f : E \rightarrow F$  is *measurable* if  $f^{-1}B \in \mathcal{E}$  for  
 534 every  $B \in \mathcal{F}$  [11, p.6].

535 Let  $(E, \mathcal{E})$  and  $(F, \mathcal{F})$  be measurable spaces. Let  $f$  be a bijection between  $E$  and  $F$ , and let  $\hat{f}$  denote  
 536 its functional inverse. Then,  $f$  is an *isomorphism* if  $f$  is measurable relative to  $\mathcal{E}$  and  $\mathcal{F}$ , and  $\hat{f}$  is  
 537 measurable with respect to  $\mathcal{F}$  and  $\mathcal{E}$ . The measurable spaces  $(E, \mathcal{E})$  and  $(F, \mathcal{F})$  are *isomorphic* if  
 538 there exists an isomorphism between them [11, p.11].

539 A measurable space  $(E, \mathcal{E})$  is a *standard measurable space* if it is isomorphic to  $(F, \mathcal{B}_F)$  for some  
 540 Borel subset  $F$  of  $\mathbb{R}$ . Polish spaces with their Borel  $\sigma$ -algebra are standard measurable spaces [11,  
 541 p.11].

542 Let  $A \subset E$ . Its *indicator*, denoted by  $1_A$ , is the function defined by

$$1_A(x) = \begin{cases} 1 & \text{if } x \in A \\ 0 & \text{if } x \notin A \end{cases}$$

543 [11, p.8]. Obviously,  $1_A$  is  $\mathcal{E}$ -measurable if and only if  $A \in \mathcal{E}$ . A function  $f : E \rightarrow \mathbb{R}$  is said to be  
 544 *simple* if it is of the form

$$f = \sum_{i=1}^n a_i 1_{A_i}$$

545 for some  $n \in \mathbb{N}$ ,  $a_1, \dots, a_n \in \mathbb{R}$  and  $A_1, \dots, A_n \in \mathcal{E}$  [11, p.8]. The  $A_1, \dots, A_n \in \mathcal{E}$  can be chosen  
 546 to be a measurable partition of  $E$ , and is then called the *canonical form* of the simple function  $f$ .  
 547 A positive function on  $E$  is  $\mathcal{E}$ -measurable if and only if it is the limit of an increasing sequence of  
 548 positive simple functions [11, p.10, Theorem 2.17].

549 A *measure* on a measurable space  $(E, \mathcal{E})$  is a mapping  $\mu : \mathcal{E} \rightarrow [0, \infty]$  such that

- 550 (i)  $\mu(\emptyset) = 0$ ;  
 551 (ii)  $\mu(\cup_{n=1}^{\infty} A_n) = \sum_{n=1}^{\infty} \mu(A_n)$  for every disjoint sequence  $(A_n)$  in  $\mathcal{E}$

552 [11, p.14]. A *measure space* is a triplet  $(E, \mathcal{E}, \mu)$ , where  $(E, \mathcal{E})$  is a measurable space and  $\mu$  is a  
 553 measure on it.

554 A measurable set  $B$  is said to be *negligible* if  $\mu(B) = 0$ , and an arbitrary subset of  $E$  is said to be  
 555 *negligible* if it is contained in a measurable negligible set. The measure space is said to be *complete*  
 556 if every negligible set is measurable [11, p.17].

557 Next, we review the notion of integration of a real-valued function  $f : E \rightarrow \mathbb{R}$  with respect to  $\mu$  [11,  
 558 p.20, Definition 4.3].

- 559 (a) Let  $f : E \rightarrow [0, \infty]$  be simple. If its canonical form is  $f = \sum_{i=1}^n a_i 1_{A_i}$  with  $a_i \in \mathbb{R}$ , then  
 560 we define

$$\int f d\mu = \sum_{i=1}^n a_i \mu(A_i).$$

- 561 (b) Suppose  $f : E \rightarrow [0, \infty]$  is measurable. Then by above, we have a sequence  $(f_n)$  of positive  
 562 simple functions such that  $f_n \rightarrow f$  pointwise. Then we define

$$\int f d\mu = \lim_{n \rightarrow \infty} \int f_n d\mu,$$

563 where  $\int f_n d\mu$  is defined for each  $n$  by (a).

- 564 (c) Suppose  $f : E \rightarrow [-\infty, \infty]$  is measurable. Then  $f^+ = \max\{f, 0\}$  and  $f^- = -\min\{f, 0\}$   
 565 are measurable and positive, so we can define  $\int f^+ d\mu$  and  $\int f^- d\mu$  as in (b). Then we define

$$\int f d\mu = \int f^+ d\mu - \int f^- d\mu$$

566 provided that at least one term on the right be positive. Otherwise,  $\int f d\mu$  is undefined. If  
 567  $\int f^+ d\mu < \infty$  and  $\int f^- d\mu < \infty$ , then we say that  $f$  is *integrable*.

568 Finally, we review the notion of *transition kernels*, which are crucial in the consideration of conditional  
 569 distributions. Let  $(E, \mathcal{E})$  and  $(F, \mathcal{F})$  be measurable spaces. Let  $K$  be a mapping  $E \times \mathcal{F} \rightarrow [0, \infty]$ .  
 570 Then,  $K$  is called a *transition kernel* from  $(E, \mathcal{E})$  into  $(F, \mathcal{F})$  if

- 571 (a) the mapping  $x \mapsto K(x, B)$  is measurable for every set  $B \in \mathcal{F}$ ; and  
 572 (b) the mapping  $B \mapsto K(x, B)$  is a measure on  $(F, \mathcal{F})$  for every  $x \in E$ .

573 A transition kernel from  $(E, \mathcal{E})$  into  $(F, \mathcal{F})$  is called a *probability transition kernel* if  $K(x, F) = 1$   
 574 for all  $x \in E$ . A probability transition kernel  $K$  from  $(E, \mathcal{E})$  into  $(E, \mathcal{E})$  is called a *Markov kernel* on  
 575  $(E, \mathcal{E})$  [11, p.37,39,40].

## 576 A.2 Probability Theory

577 Now we translate the above measure-theoretic notions into the language of probability theory, and  
 578 introduce some additional concepts. A *probability space* is a measure space  $(\Omega, \mathcal{H}, \mathbb{P})$  such that

579  $\mathbb{P}(\Omega) = 1$  [11, p.49]. We call  $\Omega$  the *sample space*, and each element  $\omega \in \Omega$  an *outcome*. We call  $\mathcal{H}$  a  
580 collection of *events*, and for any  $A \in \mathcal{H}$ , we read  $\mathbb{P}(A)$  as the *probability that the event  $A$  occurs* [11,  
581 p.50].

582 A *random variable* taking values in a measurable space  $(E, \mathcal{E})$  is a function  $X : \Omega \rightarrow E$ , measurable  
583 with respect to  $\mathcal{H}$  and  $\mathcal{E}$ . The *distribution* of  $X$  is the measure  $\mu$  on  $(E, \mathcal{E})$  defined by  $\mu(A) =$   
584  $\mathbb{P}(X^{-1}A)$  [11, p.51]. For an arbitrary set  $T$ , let  $X_t$  be a random variable taking values in  $(E, \mathcal{E})$  for  
585 each  $t \in T$ . Then the collection  $\{X_t : t \in T\}$  is called a *stochastic process* with *state space*  $(E, \mathcal{E})$   
586 and *parameter set*  $T$  [11, p.53].

587 Henceforth, random variables are defined on  $(\Omega, \mathcal{H}, \mathbb{P})$  and take values in  $[-\infty, \infty]$ . We define the  
588 *expectation* of a random variable  $X : \Omega \rightarrow [-\infty, \infty]$  as  $\mathbb{E}[X] = \int_{\Omega} X d\mathbb{P}$  [11, p.57-58]. We also  
589 define the *conditional expectation* [11, p.140, Definition 1.3]. Suppose  $\mathcal{F}$  is a sub- $\sigma$ -algebra of  $\mathcal{H}$ .

590 (a) Suppose  $X$  is a positive random variable. Then the *conditional expectation of  $X$  given  $\mathcal{F}$*  is  
591 any positive random variable  $\mathbb{E}_{\mathcal{F}}X$  satisfying

$$\mathbb{E}[VX] = \mathbb{E}[V\mathbb{E}_{\mathcal{F}}X]$$

592 for all  $V : \Omega \rightarrow [0, \infty]$  measurable with respect to  $\mathcal{F}$ .

593 (b) Suppose  $X : \Omega \rightarrow [-\infty, \infty]$  is a random variable. If  $\mathbb{E}[X]$  exists, then we define

$$\mathbb{E}_{\mathcal{F}}X = \mathbb{E}_{\mathcal{F}}X^+ - \mathbb{E}_{\mathcal{F}}X^-,$$

594 where  $\mathbb{E}_{\mathcal{F}}X^+$  and  $\mathbb{E}_{\mathcal{F}}X^-$  are defined in (a).

595 Next, we define *conditional probabilities*, and regular versions thereof [11, pp.149-151]. Suppose  
596  $H \in \mathcal{H}$ , and let  $\mathcal{F}$  be a sub- $\sigma$ -algebra of  $\mathcal{H}$ . Then the *conditional probability of  $H$  given  $\mathcal{F}$*  is defined  
597 as

$$\mathbb{P}_{\mathcal{F}}H = \mathbb{E}_{\mathcal{F}}1_H.$$

598 Let  $Q(H)$  be a version of  $\mathbb{P}_{\mathcal{F}}H$  for every  $H \in \mathcal{H}$ . Then  $Q : (\omega, H) \mapsto Q_{\omega}(H)$  is said to be a  
599 *regular version* of the conditional probability  $\mathbb{P}_{\mathcal{F}}$  provided that  $Q$  be a probability transition kernel  
600 from  $(\Omega, \mathcal{F})$  into  $(\Omega, \mathcal{H})$ . Regular versions exist if  $(\Omega, \mathcal{H})$  is a standard measurable space [11, p.151,  
601 Theorem 2.7].

602 The *conditional distribution* of a random variable  $X$  given  $\mathcal{F}$  is any transition probability kernel  
603  $L : (\omega, B) \mapsto L_{\omega}(B)$  from  $(\Omega, \mathcal{F})$  into  $(E, \mathcal{E})$  such that

$$P_{\mathcal{F}}\{Y \in B\} = L(B) \quad \text{for all } B \in \mathcal{E}.$$

604 If  $(E, \mathcal{E})$  is a standard measurable space, then a version of the conditional distribution of  $X$  given  $\mathcal{F}$   
605 exists [11, p.151].

606 Suppose that  $T$  is a totally ordered set, i.e. whenever  $r, s, t \in T$  with  $r < s$  and  $s < t$ , we have  $r < t$   
607 and for any  $s, t \in T$ , exactly one of  $s < t$ ,  $s = t$  and  $t < s$  holds [15, p.62]. For each  $t \in T$ , let  $\mathcal{F}_t$  be  
608 a sub- $\sigma$ -algebra of  $\mathcal{H}$ . The family  $\mathcal{F} = \{\mathcal{F}_t : t \in T\}$  is called a *filtration* provided that  $\mathcal{F}_s \subset \mathcal{F}_t$  for  
609  $s < t$  [11, p.79]. A *filtered probability space*  $(\Omega, \mathcal{H}, \mathcal{F}, \mathbb{P})$  is a probability space  $(\Omega, \mathcal{H}, \mathbb{P})$  endowed  
610 with a filtration  $\mathcal{F}$ .

611 Finally, we review the notion of *independence* and *conditional independence*. For a fixed integer  
612  $n \geq 2$ , let  $\mathcal{F}_1, \dots, \mathcal{F}_n$  be sub- $\sigma$ -algebras of  $\mathcal{H}$ . Then  $\{\mathcal{F}_1, \dots, \mathcal{F}_n\}$  is called an *independency* if

$$\mathbb{P}(H_1 \cap \dots \cap H_n) = \mathbb{P}(H_1) \dots \mathbb{P}(H_n)$$

613 for all  $H_1 \in \mathcal{F}_1, \dots, H_n \in \mathcal{F}_n$ . Let  $T$  be an arbitrary index set. Let  $\mathcal{F}_t$  be a sub- $\sigma$ -algebra of  $\mathcal{H}$  for  
614 each  $t \in T$ . The collection  $\{\mathcal{F}_t : t \in T\}$  is called an *independency* if its every finite subset is an  
615 independency [11, p.82].

616 Moreover,  $\mathcal{F}_1, \dots, \mathcal{F}_n$  are said to be *conditional independent* given  $\mathcal{F}$  if

$$\mathbb{P}_{\mathcal{F}}(H_1 \cap \dots \cap H_n) = \mathbb{P}_{\mathcal{F}}(H_1) \dots \mathbb{P}_{\mathcal{F}}(H_n)$$

617 for all  $H_1 \in \mathcal{F}_1, \dots, H_n \in \mathcal{F}_n$  [11, p.158].

618 **B Causal Effect**

619 In this section, we define what it means for a sub- $\sigma$ -algebra of the form  $\mathcal{H}_S$  to have a *causal effect* on  
 620 an event  $A \in \mathcal{H}$ .

621 **Definition B.1.** Let  $(\Omega, \mathcal{H}, \mathbb{P}, \mathbb{K}) = (\times_{t \in T} E_t, \otimes_{t \in T} \mathcal{E}_t, \mathbb{P}, \mathbb{K})$  be a causal space,  $U \in \mathcal{P}(T)$ ,  $A \in \mathcal{H}$   
 622 an event and  $\mathcal{F}$  a sub- $\sigma$ -algebra of  $\mathcal{H}$  (not necessarily of the form  $\mathcal{H}_S$  for some  $S \in \mathcal{P}(T)$ ).

623 (i) If  $K_S(\omega, A) = K_{S \setminus U}(\omega, A)$  for all  $S \in \mathcal{P}(T)$  and all  $\omega \in \Omega$ , then we say that  $\mathcal{H}_U$  has *no*  
 624 *causal effect on A*, or that  $\mathcal{H}_U$  is *non-causal to A*.

625 We say that  $\mathcal{H}_U$  has *no causal effect on  $\mathcal{F}$* , or that  $\mathcal{H}_U$  is *non-causal to  $\mathcal{F}$* , if, for all  $A \in \mathcal{F}$ ,  
 626  $\mathcal{H}_U$  has no causal effect on  $A$ .

627 (ii) If there exists  $\omega \in \Omega$  such that  $K_U(\omega, A) \neq \mathbb{P}(A)$ , then we say that  $\mathcal{H}_U$  has an *active*  
 628 *causal effect on A*, or that  $\mathcal{H}_U$  is *actively causal to A*.

629 We say that  $\mathcal{H}_U$  has an *active causal effect on  $\mathcal{F}$* , or that  $\mathcal{H}_U$  is *actively causal to  $\mathcal{F}$* , if  $\mathcal{H}_U$   
 630 has an active causal effect on some  $A \in \mathcal{F}$ .

631 (iii) Otherwise, we say that  $\mathcal{H}_U$  has a *dormant causal effect on A*, or that  $\mathcal{H}_U$  is *dormantly*  
 632 *causal to A*.

633 We say that  $\mathcal{H}_U$  has a *dormant causal effect on  $\mathcal{F}$* , or that  $\mathcal{H}_U$  is *dormantly causal to  $\mathcal{F}$* , if  
 634  $\mathcal{H}_U$  does not have an active causal effect on any event in  $\mathcal{F}$  and there exists  $A \in \mathcal{F}$  on which  
 635  $\mathcal{H}_U$  has a dormant causal effect.

636 Sometimes, we will say that  $\mathcal{H}_U$  has a *causal effect on A* to mean that  $\mathcal{H}_U$  has either an active or a  
 637 dormant causal effect on  $A$ .

638 The intuition is as follows. For any  $S \in \mathcal{P}(T)$  and any fixed event  $A \in \mathcal{H}$ , consider the function  
 639  $\omega_S \mapsto K_S((\omega_{S \cap U}, \omega_{S \setminus U}), A)$ . If  $\mathcal{H}_U$  has no causal effect on  $A$ , then it means that the causal kernel  
 640 does not depend on the  $\omega_{S \cap U}$  component of  $\omega_S$ . Since this has to hold for all  $S \in \mathcal{P}(T)$ , it means  
 641 that it is possible to have, for example,  $K_U(\omega, A) = \mathbb{P}(A)$  for all  $\omega \in \Omega$  and yet for  $\mathcal{H}_U$  to have  
 642 a causal effect on  $A$ . This would be precisely the case where  $\mathcal{H}_U$  has a dormant causal effect on  
 643  $A$ , and it means that, for some  $S \in \mathcal{P}(T)$ ,  $\omega_S \mapsto K_S((\omega_{S \cap U}, \omega_{S \setminus U}), A)$  does depend on the  $\omega_{S \cap U}$   
 644 component.

645 We collect some straightforward but important special cases in the following remark.

646 **Remark B.2.** (a) If  $\mathcal{H}_U$  has no causal effect on  $A$ , then letting  $S = U$  in Definition B.1(i) and  
 647 applying Definition 2.2(i), we can see that, for all  $\omega \in \Omega$ ,

$$K_U(\omega, A) = K_{U \setminus U}(\omega, A) = K_\emptyset(\omega, A) = \mathbb{P}(A).$$

648 In particular, this means that  $\mathcal{H}_U$  cannot have both no causal effect and active causal effect  
 649 on  $A$ .

650 (b) It is immediate that the trivial  $\sigma$ -algebra  $\mathcal{H}_\emptyset = \{\emptyset, \Omega\}$  has no causal effect on any event  
 651  $A \in \mathcal{H}$ . Conversely, it is also clear that  $\mathcal{H}_U$  for any  $U \in \mathcal{P}(T)$  has no causal effect on the  
 652 trivial  $\sigma$ -algebra.

653 (c) Let  $U \in \mathcal{P}(T)$  and  $\mathcal{F}$  a sub- $\sigma$ -algebra of  $\mathcal{H}$ . If  $\mathcal{H}_U \cap \mathcal{F} \neq \{\emptyset, \Omega\}$ , then  $\mathcal{H}_U$  has an active  
 654 causal effect on  $\mathcal{F}$ , since, for  $A \in \mathcal{H}_U \cap \mathcal{F}$  with  $A \neq \emptyset$  and  $A \neq \Omega$ , Definition 2.2(ii) tells  
 655 us that  $K_U(\cdot, A) = 1_A(\cdot) \neq \mathbb{P}(A)$ . In particular,  $\mathcal{H}_U$  has an active causal effect on itself.  
 656 Further, the full  $\sigma$ -algebra  $\mathcal{H} = \mathcal{H}_T$  has an active causal effect on all of its sub- $\sigma$ -algebras  
 657 except the trivial  $\sigma$ -algebra, and every  $\mathcal{H}_U, U \in \mathcal{P}(T)$  except the trivial  $\sigma$ -algebra has an  
 658 active causal effect on the full  $\sigma$ -algebra  $\mathcal{H}$ .

659 (d) Let  $U \in \mathcal{P}(T)$  and  $\mathcal{F}_1, \mathcal{F}_2$  be sub- $\sigma$ -algebras of  $\mathcal{H}$ . If  $\mathcal{F}_1 \subseteq \mathcal{F}_2$  and  $\mathcal{H}_U$  has no causal effect  
 660 on  $\mathcal{F}_2$ , then it is clear that  $\mathcal{H}_U$  has no causal effect on  $\mathcal{F}_1$ .

661 (e) If  $\mathcal{H}_U$  has no causal effect on an event  $A$ , then for any  $V \in \mathcal{P}(T)$  with  $V \subseteq U$ ,  $\mathcal{H}_V$  has no  
 662 causal effect on  $A$ . Indeed, take any  $S \in \mathcal{P}(T)$ . Then using the fact that  $\mathcal{H}_U$  has no causal  
 663 effect on  $A$ , see that, for any  $\omega \in \Omega$ ,

$$K_{S \setminus V}(\omega, A) = K_{(S \setminus V) \setminus U}(\omega, A) \quad \text{applying Definition B.1(i) with } S \setminus V$$

$$\begin{aligned}
&= K_{S \setminus U}(\omega, A) && \text{since } V \subseteq U \\
&= K_S(\omega, A) && \text{applying Definition B.1(i) with } S.
\end{aligned}$$

664 Since  $S \in \mathcal{P}(T)$  was arbitrary, we have that  $\mathcal{H}_V$  has no causal effect on  $A$ .

665 (f) Contrapositively, if  $U, V \in \mathcal{P}(T)$  with  $V \subseteq U$  and  $\mathcal{H}_V$  has a causal effect on  $A$ , then  $\mathcal{H}_U$   
666 has a causal effect on  $A$ .

667 (g) If  $U \in \mathcal{P}(T)$  has no causal effect on  $A$ , then for any  $V \in \mathcal{P}(T)$ , we have

$$K_V(\omega, A) = K_{U \cup V}(\omega, A).$$

668 Indeed,

$$\begin{aligned}
K_{U \cup V}(\omega, A) &= K_{(U \cup V) \setminus (U \setminus V)}(\omega, A) && \text{since } U \setminus V \text{ has no causal effect on } A \text{ by (e)} \\
&= K_V(\omega, A) && \text{since } (U \cup V) \setminus (U \setminus V) = V.
\end{aligned}$$

669 (h) If  $U, V \in \mathcal{P}(T)$  and neither  $\mathcal{H}_U$  nor  $\mathcal{H}_V$  has a causal effect on  $A$ , then  $\mathcal{H}_{U \cup V}$  has no causal  
670 effect on  $A$ . Indeed, for any  $S \in \mathcal{P}(T)$  and any  $\omega \in \Omega$ ,

$$\begin{aligned}
K_{S \setminus (U \cup V)}(\omega, A) &= K_{(S \setminus U) \setminus V}(\omega, A) \\
&= K_{S \setminus U}(\omega, A) && \text{as } V \text{ has no causal effect on } A \\
&= K_S(\omega, A) && \text{as } U \text{ has no causal effect on } A.
\end{aligned}$$

671 Since  $S \in \mathcal{P}(T)$  was arbitrary,  $\mathcal{H}_{U \cup V}$  has no causal effect on  $A$ .

672 (i) Contrapositively, if  $U, V \in \mathcal{P}(T)$  and  $\mathcal{H}_{U \cup V}$  has a causal effect on  $A$ , then either  $\mathcal{H}_U$  or  
673  $\mathcal{H}_V$  has a causal effect on  $A$ .

674 Following the definition of no causal effect, we define the notion of a *trivial causal kernel*.

675 **Definition B.3.** Let  $(\Omega, \mathcal{H}, \mathbb{P}, \mathbb{K}) = (\times_{t \in T} E_t, \otimes_{t \in T} \mathcal{E}_t, \mathbb{P}, \mathbb{K})$  be a causal space, and  $U \in \mathcal{P}(T)$ . We  
676 say that the causal kernel  $K_U$  is *trivial* if  $\mathcal{H}_U$  has no causal effect on  $\mathcal{H}_{T \setminus U}$ .

677 Note that we can decompose  $\mathcal{H}$  as  $\mathcal{H} = \mathcal{H}_U \otimes \mathcal{H}_{T \setminus U}$ , and so  $\mathcal{H}$  is generated by events of the  
678 form  $A \times B$  for  $A \in \mathcal{H}_U$  and  $B \in \mathcal{H}_{T \setminus U}$ . But if  $K_U$  is trivial, then we have, by Axiom 2.2(ii),  
679  $K_U(\omega, A \times B) = 1_A(\omega) \mathbb{P}(B)$  for such a rectangle.

680 We also define a ‘‘conditional’’ version of causal effects.

681 **Definition B.4.** Let  $(\Omega, \mathcal{H}, \mathbb{P}, \mathbb{K}) = (\times_{t \in T} E_t, \otimes_{t \in T} \mathcal{E}_t, \mathbb{P}, \mathbb{K})$  be a causal space,  $U, V \in \mathcal{P}(T)$ ,  
682  $A \in \mathcal{H}$  an event and  $\mathcal{F}$  a sub- $\sigma$ -algebra of  $\mathcal{H}$  (not necessarily of the form  $\mathcal{H}_S$  for some  $S \in \mathcal{P}(T)$ ).

683 (i) If  $K_{S \cup V}(\omega, A) = K_{(S \cup V) \setminus (U \setminus V)}(\omega, A)$  for all  $S \in \mathcal{P}(T)$  and all  $\omega \in \Omega$ , then we say that  
684  $\mathcal{H}_U$  has *no causal effect on  $A$  given  $\mathcal{H}_V$* , or that  $\mathcal{H}_U$  is *non-causal to  $A$  given  $\mathcal{H}_V$* .

685 We say that  $\mathcal{H}_U$  has *no causal effect on  $\mathcal{F}$  given  $\mathcal{H}_V$* , or that  $\mathcal{H}_U$  is *non-causal to  $\mathcal{F}$  given*  
686  $\mathcal{H}_V$ , if, for all  $A \in \mathcal{F}$ ,  $\mathcal{H}_U$  has no causal effect on  $A$  given  $\mathcal{H}_V$ .

687 (ii) If there exists  $\omega \in \Omega$  such that  $K_{U \cup V}(\omega, A) \neq K_V(\omega, A)$ , then we say that  $\mathcal{H}_U$  has an  
688 *active causal effect on  $A$  given  $\mathcal{H}_V$* , or that  $\mathcal{H}_U$  is *actively causal to  $A$  given  $\mathcal{H}_V$* .

689 We say that  $\mathcal{H}_U$  has an *active causal effect on  $\mathcal{F}$  given  $\mathcal{H}_V$* , or that  $\mathcal{H}_U$  is *actively causal to*  
690  $\mathcal{F}$  *given  $\mathcal{H}_V$* , if  $\mathcal{H}_U$  has an active causal effect on some  $A \in \mathcal{F}$ .

691 (iii) Otherwise, we say that  $\mathcal{H}_U$  has a *dormant causal effect on  $A$  given  $\mathcal{H}_V$* , or that  $\mathcal{H}_U$  is  
692 *dormantly causal to  $A$  given  $\mathcal{H}_V$* .

693 We say that  $\mathcal{H}_U$  has a *dormant causal effect on  $\mathcal{F}$  given  $\mathcal{H}_V$* , or that  $\mathcal{H}_U$  is *dormantly causal*  
694 *to  $\mathcal{F}$  given  $\mathcal{H}_V$* , if  $\mathcal{H}_U$  does not have an active causal effect on any event in  $\mathcal{F}$  given  $\mathcal{H}_V$  and  
695 there exists  $A \in \mathcal{F}$  on which  $\mathcal{H}_U$  has a dormant causal effect given  $\mathcal{H}_V$ .

696 Sometimes, we will say that  $\mathcal{H}_U$  has a *causal effect on  $A$  given  $\mathcal{H}_V$*  to mean that  $\mathcal{H}_U$  has either an  
697 active or a dormant causal effect on  $A$  given  $\mathcal{H}_V$ .

698 The intuition is as follows. For any fixed  $S \in \mathcal{P}(T)$  and any fixed event  $A \in \mathcal{H}$ , consider the function  
699  $\omega_{S \cup V} \mapsto K_{S \cup V}((\omega_{(S \cup V) \setminus (U \setminus V)}, \omega_{S \cap (U \setminus V)}), A)$ . If  $\mathcal{H}_U$  has no causal effect on  $A$  given  $\mathcal{H}_V$ , then it  
700 means that the causal kernel does not depend on the  $\omega_{S \cap (U \setminus V)}$  component of  $\omega_{S \cup V}$ ; in other words,  
701  $\mathcal{H}_U$  only has an influence on  $A$  through its  $V$  component.

702 We collect some important special cases in the following remark.

703 **Remark B.5.** (a) Letting  $V = U$ , we always have  $K_{S \cup U}(\omega, A) = K_{(S \cup U) \setminus (U \setminus U)}(\omega, A) =$   
704  $K_{S \cup U}(\omega, A)$  for all  $\omega \in \Omega$  and  $A \in \mathcal{H}$ , which means that  $\mathcal{H}_U$  has no causal effect on any  
705 event  $A \in \mathcal{H}$  given itself.

706 (b) If  $\mathcal{H}_U$  has no causal effect on  $A$  given  $\mathcal{H}_V$ , then letting  $U = S$  in Definition B.4(i), we see  
707 that, for all  $\omega \in \Omega$ ,

$$K_{U \cup V}(\omega, A) = K_V(\omega, A).$$

708 In particular, this means that  $\mathcal{H}_U$  cannot have both no causal effect and active causal effect  
709 on  $A$  given  $\mathcal{H}_V$ .

710 (c) The case  $V = \emptyset$  reduces Definition B.4 to Definition B.1, i.e.  $\mathcal{H}_U$  having no causal effect in  
711 the sense of Definition B.1 is the same as  $\mathcal{H}_U$  having no causal effect given  $\{\emptyset, \Omega\}$  in the  
712 sense of Definition B.4, etc.

713 (d) It is possible for  $\mathcal{H}_U$  to be causal to an event  $A$ , and for there to exist  $V \in \mathcal{P}(T)$  such  
714 that  $\mathcal{H}_U$  has no causal effect on  $A$  given  $\mathcal{H}_V$ . However, if  $\mathcal{H}_U$  has no causal effect on  $A$ ,  
715 then for any  $V \in \mathcal{P}(T)$ ,  $\mathcal{H}_U$  has no causal effect on  $A$  given  $\mathcal{H}_V$ . To see this, note that  
716 Remark B.2(e) tells us that  $U \setminus V$  also does not have any causal effect on  $A$ . Then given  
717 any  $S \in \mathcal{P}(T)$ ,

$$K_{S \cup V}(\omega, A) = K_{(S \cup V) \setminus (U \setminus V)}(\omega, A),$$

718 applying Definition B.1(i) to  $S \cup V$ . Since  $S \in \mathcal{P}(T)$  was arbitrary,  $\mathcal{H}_U$  has no causal effect  
719 on  $A$  given  $\mathcal{H}_V$ .

## 720 C Interventions

721 In this section, we provide a few more definitions and results related to the notion of interventions,  
722 introduced in Definition 2.3.

723 First, we make a few remarks on how the intervention causal kernels  $K_S^{\text{do}(U, \mathbb{Q}, \mathbb{L})}$  behave in some  
724 special cases, depending on the relationship between  $U$  and  $S$ .

725 **Remark C.1.** (a) For  $S \in \mathcal{P}(T)$  with  $U \subseteq S$ , we have, for all  $\omega \in \Omega$  and all  $A \in \mathcal{H}$ ,

$$\begin{aligned} K_S^{\text{do}(U, \mathbb{Q}, \mathbb{L})}(\omega, A) &= \int L_U(\omega_U, d\omega'_U) K_S((\omega_{S \setminus U}, \omega'_U), A) \\ &= \int \delta_{\omega_U}(d\omega'_U) K_S((\omega_{S \setminus U}, \omega'_U), A) \quad \text{by Definition 2.2(ii)} \\ &= K_S((\omega_{S \setminus U}, \omega_U), A) \\ &= K_S(\omega, A). \end{aligned}$$

726 This means that, after an intervention on  $\mathcal{H}_U$ , subsequent interventions on  $\mathcal{H}_S$  with  $\mathcal{H}_U \subseteq$   
727  $\mathcal{H}_S$  simply overwrite the original intervention. Note that this is reminiscent of the “partial  
728 ordering on the set of interventions” in [44], but in our setting, this is given by the partial  
729 ordering induced by the inclusion structure of sub- $\sigma$ -algebras of  $\mathcal{H}$ .

730 (b) For  $S \in \mathcal{P}(T)$  with  $S \subseteq U$ ,

$$K_S^{\text{do}(U, \mathbb{Q}, \mathbb{L})}(\omega, A) = \int L_S(\omega_S, d\omega'_U) K_U(\omega'_U, A)$$

731 for all  $\omega \in \Omega$  and  $A \in \mathcal{H}$ , i.e.  $K_S^{\text{do}(U, \mathbb{Q}, \mathbb{L})}$  is a product of the two kernels  $K_U$  and  $L_S$  [11,  
732 p.39]; in particular,  $K_S^{\text{do}(U, \mathbb{Q}, \mathbb{L})}(\omega, A) = L_S(\omega, A)$  for all  $A \in \mathcal{H}_U$ .

733 (c) For  $S \in \mathcal{P}(T)$  with  $S \cap U = \emptyset$ ,

$$\begin{aligned} K_S^{\text{do}(U, \mathbb{Q}, \mathbb{L})}(\omega, A) &= \int L_\emptyset(\omega_\emptyset, d\omega'_U) K_{S \cup U}((\omega_S, \omega'_U), A) \\ &= \int \mathbb{Q}(d\omega'_U) K_{S \cup U}((\omega_S, \omega'_U), A) \quad \text{by Definition 2.2(i)} \end{aligned}$$

734 for all  $\omega \in \Omega$  and  $A \in \mathcal{H}$ , i.e. the effect of intervening on  $\mathcal{H}_U$  with  $\mathbb{Q}$  then  $\mathcal{H}_S$  is the same  
735 as intervening on  $\mathcal{H}_{U \cup S}$  with a product measure of  $\mathbb{Q}$  on  $\mathcal{H}_U$  and whatever measure we  
736 place on  $\mathcal{H}_S$ .

737 We give it a name for the special case in which the internal causal kernels are all trivial (see Definition  
738 B.3).

739 **Definition C.2.** Let  $(\Omega, \mathcal{H}, \mathbb{P}, \mathbb{K}) = (\times_{t \in T} E_t, \otimes_{t \in T} \mathcal{E}_t, \mathbb{P}, \mathbb{K})$  be a causal space, and  $U \in \mathcal{P}(T)$   
740 and  $\mathbb{Q}$  a probability measure on  $(\Omega, \mathcal{H}_U)$ . A *hard intervention on  $\mathcal{H}_U$  via  $\mathbb{Q}$*  is a new causal  
741 space  $(\Omega, \mathcal{H}, \mathbb{P}^{\text{do}(U, \mathbb{Q})}, \mathbb{K}^{\text{do}(U, \mathbb{Q}, \text{hard})})$ , where the intervention measure  $\mathbb{P}^{\text{do}(U, \mathbb{Q})}$  is a probability mea-  
742 sure  $(\Omega, \mathcal{H})$  defined in the same way as in Definition 2.3, and the intervention causal mechanism  
743  $\mathbb{K}^{\text{do}(U, \mathbb{Q}, \text{hard})} = \{K_S^{\text{do}(U, \mathbb{Q}, \text{hard})} : S \in \mathcal{P}(T)\}$  consists of causal kernels that are obtained from the  
744 intervention causal kernels in Definition 2.3 in which  $L_{S \cap U}$  is a trivial causal kernel, i.e. one that has  
745 no causal effect on  $\mathcal{H}_{U \setminus S}$ .

746 From the discussion following Definition B.3, we have that, for  $A \in \mathcal{H}_{S \cap U}$  and  $B \in \mathcal{H}_{U \setminus S}$ ,  
747  $L_{S \cap U}(\omega, A \times B) = 1_A(\omega_{S \cap U}) \mathbb{Q}(B)$ .

748 The next result gives an explicit expression for the causal kernels obtained after a hard intervention.

749 **Theorem C.3.** Let  $(\Omega, \mathcal{H}, \mathbb{P}, \mathbb{K}) = (\times_{t \in T} E_t, \otimes_{t \in T} \mathcal{E}_t, \mathbb{P}, \mathbb{K})$  be a causal space, and  $U \in \mathcal{P}(T)$  and  
750  $\mathbb{Q}$  a probability measure on  $(\Omega, \mathcal{H}_U)$ . Then after a hard intervention on  $\mathcal{H}_U$  via  $\mathbb{Q}$ , the intervention  
751 causal kernels  $K_S^{\text{do}(U, \mathbb{Q}, \text{hard})}$  are given by

$$K_S^{\text{do}(U, \mathbb{Q}, \text{hard})}(\omega, A) = K_S^{\text{do}(U, \mathbb{Q}, \text{hard})}(\omega_S, A) = \int \mathbb{Q}(d\omega'_{U \setminus S}) K_{S \cup U}((\omega_S, \omega'_{U \setminus S}), A).$$

752 Intuitively, hard interventions do not encode any internal causal relationships within  $\mathcal{H}_U$ , so after we  
753 subsequently intervene on  $\mathcal{H}_S$ , the measure  $\mathbb{Q}$  that we originally imposed on  $\mathcal{H}_U$  remains on  $\mathcal{H}_{U \setminus S}$ .

754 The following lemma contains a couple of results about particular sub- $\sigma$ -algebras having no causal  
755 effects on particular events in the intervention causal space, regardless of the measure and causal  
756 mechanism that was used for the intervention.

757 **Lemma C.4.** Let  $(\Omega, \mathcal{H}, \mathbb{P}, \mathbb{K}) = (\times_{t \in T} E_t, \otimes_{t \in T} \mathcal{E}_t, \mathbb{P}, \mathbb{K})$  be a causal space, and  $U \in \mathcal{P}(T)$ ,  $\mathbb{Q}$  a  
758 probability measure on  $(\Omega, \mathcal{H}_U)$  and  $\mathbb{L} = \{L_V : V \in \mathcal{P}(U)\}$  a causal mechanism on  $(\Omega, \mathcal{H}_U, \mathbb{Q})$ .  
759 Suppose we intervene on  $\mathcal{H}_U$  via  $(\mathbb{Q}, \mathbb{L})$ .

760 (i) For  $A \in \mathcal{H}_U$  and  $V \in \mathcal{P}(T)$  with  $V \cap U = \emptyset$ ,  $\mathcal{H}_V$  has no causal effect on  $A$  (c.f. Definition  
761 B.1(i)) in the intervention causal space  $(\Omega, \mathcal{H}, \mathbb{P}^{\text{do}(U, \mathbb{Q})}, \mathbb{K}^{\text{do}(U, \mathbb{Q}, \mathbb{L})})$ , i.e. events in the  $\sigma$ -  
762 algebra  $\mathcal{H}_U$  on which intervention took place are not causally affected by  $\sigma$ -algebras outside  
763  $\mathcal{H}_U$ .

764 (ii) Again, let  $V \in \mathcal{P}(T)$  with  $V \cap U = \emptyset$ , and also let  $A \in \mathcal{H}$  be any event. If, in the original  
765 causal space,  $\mathcal{H}_V$  had no causal effect on  $A$ , then in the intervention causal space,  $\mathcal{H}_V$  has  
766 no causal effect on  $A$  either.

767 (iii) Now let  $V \in \mathcal{P}(T)$ ,  $A \in \mathcal{H}$  any event and suppose that the intervention on  $\mathcal{H}_U$  via  $\mathbb{Q}$  is  
768 hard. Then if  $\mathcal{H}_V$  had no causal effect on  $A$  in the original causal space, then  $\mathcal{H}_V$  has no  
769 causal effect on  $A$  in the intervention causal space either.

770 Lemma C.4(ii) and (iii) tell us that, if  $\mathcal{H}_V$  had no causal effect on  $A$  in the original causal space, then  
771 by intervening on  $\mathcal{H}_U$  with  $V \cap U = \emptyset$  or by any hard intervention, we cannot create a causal effect  
772 from  $\mathcal{H}_V$  on  $A$ . However, by intervening on a sub- $\sigma$ -algebra that contains both  $\mathcal{H}_V$  and (a part of)  
773  $A$ , and manipulating the internal causal mechanism  $\mathbb{L}$  appropriately, it is clear that we can create a  
774 causal effect from  $\mathcal{H}_V$ .

775 The next result tells us that if a sub- $\sigma$ -algebra  $\mathcal{H}_U$  has a dormant causal effect on an event  $A$ , then  
776 there is a sub- $\sigma$ -algebra of  $\mathcal{H}_U$  and a hard intervention after which that sub- $\sigma$ -algebra has an active  
777 causal effect on  $A$ .

778 **Lemma C.5.** *Let  $(\Omega, \mathcal{H}, \mathbb{P}, \mathbb{K}) = (\times_{t \in T} E_t, \otimes_{t \in T} \mathcal{E}_t, \mathbb{P}, \mathbb{K})$  be a causal space, and  $U \in \mathcal{P}(T)$ . For  
779 an event  $A \in \mathcal{H}$ , if  $\mathcal{H}_U$  has a dormant causal effect on  $A$  in the original causal space, then there  
780 exists a hard intervention and a subset  $V \subseteq U$  such that in the intervention causal space,  $\mathcal{H}_V$  has an  
781 active causal effect on  $A$ .*

782 The next result is about what happens to a causal effect of a sub- $\sigma$ -algebra that has no causal effect  
783 on an event conditioned on another sub- $\sigma$ -algebra, after intervening on that sub- $\sigma$ -algebra.

784 **Lemma C.6.** *Let  $(\Omega, \mathcal{H}, \mathbb{P}, \mathbb{K}) = (\times_{t \in T} E_t, \otimes_{t \in T} \mathcal{E}_t, \mathbb{P}, \mathbb{K})$  be a causal space, and  $U, V \in \mathcal{P}(T)$ .  
785 For an event  $A \in \mathcal{H}$ , suppose that  $\mathcal{H}_U$  has no causal effect on  $A$  given  $\mathcal{H}_V$  (see Definition B.4). Then  
786 after an intervention on  $\mathcal{H}_V$  via any  $(\mathbb{Q}, \mathbb{L})$ ,  $\mathcal{H}_{U \setminus V}$  has no causal effect on  $A$ .*

787 The next result shows that, under a hard intervention, a time-respecting causal mechanism stays  
788 time-respecting.

789 **Theorem C.7.** *Let  $(\Omega, \mathcal{H}, \mathbb{P}, \mathbb{K}) = (\times_{t \in T} E_t, \otimes_{t \in T} \mathcal{E}_t, \mathbb{P}, \mathbb{K})$  be a causal space, where the index  
790 set  $T$  can be written as  $T = W \times \bar{T}$ , with  $W$  representing time and  $\bar{T}$  respecting time. Take  
791 any  $U \in \mathcal{P}(T)$  and any probability measure  $\mathbb{Q}$  on  $\mathcal{H}_U$ . Then the intervention causal mechanism  
792  $\mathbb{K}^{\text{do}(U, \mathbb{Q}, \text{hard})}$  also respects time.*

## 793 D Sources

794 In causal spaces, the observational distribution  $\mathbb{P}$  and the causal mechanism  $\mathbb{K}$  are completely  
795 decoupled. In Section 3.1, we give a detailed argument as to why this is desirable, but of course, there  
796 is no doubt that the special case in which the causal kernels coincide with conditional measures with  
797 respect to  $\mathbb{P}$  is worth studying. To that end, we introduce the notion of *sources*.

798 **Definition D.1.** Let  $(\Omega, \mathcal{H}, \mathbb{P}, \mathbb{K}) = (\times_{t \in T} E_t, \otimes_{t \in T} \mathcal{E}_t, \mathbb{P}, \mathbb{K})$  be a causal space,  $U \in \mathcal{P}(T)$ ,  $A \in \mathcal{H}$   
799 an event and  $\mathcal{F}$  a sub- $\sigma$ -algebra of  $\mathcal{H}$ . We say that  $\mathcal{H}_U$  is a (*local*) *source* of  $A$  if  $K_U(\cdot, A)$  is a version  
800 of the conditional probability  $\mathbb{P}_{\mathcal{H}_U}(A)$ . We say that  $\mathcal{H}_U$  is a (*local*) *source* of  $\mathcal{F}$  if  $\mathcal{H}_U$  is a source of  
801 all  $A \in \mathcal{F}$ . We say that  $\mathcal{H}_U$  is a *global source* of the causal space if  $\mathcal{H}_U$  is a source of all  $A \in \mathcal{H}$ .

802 Clearly, source  $\sigma$ -algebras are not unique (whether local or global). It is easy to see that  $\mathcal{H}_\emptyset = \{\emptyset, \Omega\}$   
803 and  $\mathcal{H} = \mathcal{H}_T = \otimes_{t \in T} \mathcal{E}_t$  are global sources, and axiom (ii) of Definition 2.2 implies that any  $\mathcal{H}_S$  is  
804 a local source of any of its sub- $\sigma$ -algebras, including itself, since, for any  $A \in \mathcal{H}_U$ ,  $\mathbb{P}_{\mathcal{H}_U}(A) = 1_A$ .  
805 Also, a sub- $\sigma$ -algebra of a source is not necessarily a source, nor is a  $\sigma$ -algebra that contains a  
806 source necessarily a source (whether local or global). In Example 2.5 above, altitude is a source  
807 of temperature (and hence a global source), since the causal kernel corresponding to temperature  
808 coincides with the conditional measure given altitude, but temperature is not a source of altitude.

809 When we intervene on  $\mathcal{H}_U$  (via any  $(\mathbb{Q}, \mathbb{L})$ ),  $\mathcal{H}_U$  becomes a global source. This precisely coincides  
810 with the “gold standard” that is randomised control trials in causal inference, i.e. the idea that, if  
811 we are able to intervene on  $\mathcal{H}_U$ , then the causal effect of  $\mathcal{H}_U$  on any event can be obtained by first  
812 intervening on  $\mathcal{H}_U$ , then considering the conditional distribution on  $\mathcal{H}_U$ . Next is a theorem showing  
813 that when one intervenes on  $\mathcal{H}_U$ , then  $\mathcal{H}_U$  becomes a source.

814 **Theorem D.2.** *Suppose we have a causal space  $(\Omega, \mathcal{H}, \mathbb{P}, \mathbb{K}) = (\times_{t \in T} E_t, \otimes_{t \in T} \mathcal{E}_t, \mathbb{P}, \mathbb{K})$ , and let  
815  $U \in \mathcal{P}(T)$ .*

816 (i) *For any measure  $\mathbb{Q}$  on  $\mathcal{H}_U$  and any causal mechanism  $\mathbb{L}$  on  $(\Omega, \mathcal{H}_U, \mathbb{Q})$ , the causal kernel  
817  $K_U^{\text{do}(U, \mathbb{Q}, \mathbb{L})} = K_U$  is a version of  $\mathbb{P}_{\mathcal{H}_U}^{\text{do}(U, \mathbb{Q})}$ , which means that  $\mathcal{H}_U$  is a global source  $\sigma$ -  
818 algebra of the intervened causal space  $(\Omega, \mathcal{H}, \mathbb{P}^{\text{do}(U, \mathbb{Q})}, \mathbb{K}^{\text{do}(U, \mathbb{Q}, \mathbb{L})})$ .*

819 (ii) *Suppose  $V \in \mathcal{P}(T)$  with  $V \subseteq U$ . Suppose that the measure  $\mathbb{Q}$  on  $(\Omega, \mathcal{H}_U)$  factorises  
820 over  $\mathcal{H}_V$  and  $\mathcal{H}_{U \setminus V}$ , i.e. for any  $A \in \mathcal{H}_V$  and  $B \in \mathcal{H}_{U \setminus V}$ ,  $\mathbb{Q}(A \cap B) = \mathbb{Q}(A)\mathbb{Q}(B)$ .  
821 Then after a hard intervention on  $\mathcal{H}_U$  via  $\mathbb{Q}$ , the causal kernel  $K_V^{\text{do}(U, \mathbb{Q}, \text{hard})}$  is a version of  
822  $\mathbb{P}_V^{\text{do}(U, \mathbb{Q})}$ , which means that  $\mathcal{H}_V$  is a global source  $\sigma$ -algebra of the intervened causal space  
823  $(\Omega, \mathcal{H}, \mathbb{P}^{\text{do}(U, \mathbb{Q})}, \mathbb{K}^{\text{do}(U, \mathbb{Q}, \text{hard})})$ .*



824 Let  $A \in \mathcal{H}$  be an event, and  $U \in \mathcal{P}(T)$ . By the definition of the intervention measure (Definition  
825 2.3), we always have

$$\mathbb{P}^{\text{do}(U, \mathbb{Q})}(A) = \int \mathbb{Q}(d\omega) K_U(\omega, A),$$

826 hence  $\mathbb{P}^{\text{do}(U, \mathbb{Q})}(A)$  can be written in terms of  $\mathbb{P}$  and  $\mathbb{Q}$  if  $K_U(\omega, A)$  can be written in terms of  $\mathbb{P}$ . This  
827 can be seen to occur in three trivial cases: first, if  $\mathcal{H}_U$  is a local source of  $A$  (see Definition D.1),  
828 in which case  $K_U(\omega, A) = \mathbb{P}_{\mathcal{H}_U}(\omega, A)$ ; secondly, if  $\mathcal{H}_U$  has no causal effect on  $A$  (see Definition  
829 B.1), in which case  $K_U(\omega, A) = \mathbb{P}(A)$ ; and finally, if  $A \in \mathcal{H}_U$ , in which case, by intervention  
830 determinism (Definition 2.2(ii), we have  $K_U(\omega, A) = 1_A(\omega)$ . In the latter case, we do not even have  
831 dependence on  $\mathbb{P}$ . Can we generalise these results?

832 **Lemma D.3.** *Let  $(\Omega, \mathcal{H}, \mathbb{P}, \mathbb{K}) = (\times_{t \in T} E_t, \otimes_{t \in T} \mathcal{E}_t, \mathbb{P}, \mathbb{K})$  be a causal space. Let  $A \in \mathcal{H}$  be an  
833 event, and  $U \in \mathcal{P}(T)$ . If there exists a sub- $\sigma$ -algebra  $\mathcal{G}$  of  $\mathcal{H}$  (not necessarily of the form  $\mathcal{H}_V$  for  
834 some  $V \in \mathcal{P}(T)$ ) such that*

- 835 (i) *the conditional probability  $\mathbb{P}_{\mathcal{H}_U \vee \mathcal{G}}^{\text{do}(U, \mathbb{Q})}(\cdot, A)$  can be written in terms of  $\mathbb{P}$  and  $\mathbb{Q}$ ;*
- 836 (ii) *the causal kernel  $K_U(\cdot, B)$  can be written in terms of  $\mathbb{P}$  for all  $B \in \mathcal{G}$ ;*

837 *then  $\mathbb{P}^{\text{do}(U, \mathbb{Q})}(A)$  can be written in terms of  $\mathbb{P}$  and  $\mathbb{Q}$ .*

838 **Remark D.4.** The three cases discussed in the paragraph above Lemma D.3 are special cases of the  
839 Lemma with  $\mathcal{G}$  being any sub- $\sigma$ -algebra of  $\mathcal{H}$  with  $\{\emptyset, \Omega\} \subseteq \mathcal{G} \subseteq \mathcal{H}_U$ . In this case, condition (ii) is  
840 trivially satisfied since we have  $K_U(\cdot, B) = 1_B(\cdot)$  by intervention determinism (Definition 2.2(ii)),  
841 and for condition (i), by Theorem D.2(i), we have  $\mathbb{P}_{\mathcal{H}_U}^{\text{do}(U, \mathbb{Q})}(\cdot, A) = K_U(\cdot, A)$ , which means that the  
842 problem reduces to checking if  $K_U(\cdot, A)$  can be written in terms of  $\mathbb{P}$ .

843 *Proof.* By law of total expectations, for any  $V \in \mathcal{P}(T)$ , we have

$$\begin{aligned} \mathbb{P}^{\text{do}(U, \mathbb{Q})}(A) &= \int \mathbb{P}_{\mathcal{H}_U \vee \mathcal{G}}^{\text{do}(U, \mathbb{Q})}(\omega, A) \mathbb{P}^{\text{do}(U, \mathbb{Q})}(d\omega) \\ &= \int \mathbb{P}_{\mathcal{H}_U \vee \mathcal{G}}^{\text{do}(U, \mathbb{Q})}(\omega, A) \int \mathbb{Q}(d\omega') K_U(\omega', d\omega). \end{aligned}$$

844 Here,  $\mathbb{P}_{\mathcal{H}_U \vee \mathcal{G}}^{\text{do}(U, \mathbb{Q})}(\omega, A)$  can be written in terms of  $\mathbb{P}$  and  $\mathbb{Q}$  by condition (i). Moreover, note that it  
845 suffices to be able to write the restriction of  $K_U(\omega', \cdot)$  to  $\mathcal{H}_U \vee \mathcal{G}$  in terms of  $\mathbb{P}$ , since the integration  
846 is of a  $\mathcal{H}_U \vee \mathcal{G}$ -measurable function. Since the collection of intersections  $\{D \cap B, D \in \mathcal{H}_U, B \in \mathcal{G}\}$   
847 is a  $\pi$ -system that generates  $\mathcal{H}_U \vee \mathcal{G}$  [11, p.5, 1.18], it suffices to check that  $K_U(\omega', D \cap B)$  can  
848 be written in terms of  $\mathbb{P}$  for all  $D \in \mathcal{H}_U$  and  $B \in \mathcal{G}$ . But by interventional determinism (Definition  
849 2.2(ii)), we have  $K_U(\omega', D \cap B) = 1_D(\omega') K_U(\omega', B)$ . Since  $K_U(\omega', B)$  can be written in terms of  
850  $\mathbb{P}$  by condition (ii), the restriction of  $K_U(\omega', \cdot)$  to  $\mathcal{H}_U \vee \mathcal{G}$  can be written in terms of  $\mathbb{P}$ , and hence  
851  $\mathbb{P}^{\text{do}(U, \mathbb{Q})}(A)$  can be written in terms of  $\mathbb{P}$  and  $\mathbb{Q}$ .  $\square$

852 **Corollary D.5.** *Let  $(\Omega, \mathcal{H}, \mathbb{P}, \mathbb{K}) = (\times_{t \in T} E_t, \otimes_{t \in T} \mathcal{E}_t, \mathbb{P}, \mathbb{K})$  be a causal space. Let  $A \in \mathcal{H}$  be an  
853 event, and  $U \in \mathcal{P}(T)$ . If there exists a  $V \in \mathcal{P}(T)$  such that condition (i) of Lemma D.3 is satisfied  
854 with  $\mathcal{G} = \mathcal{H}_V$  and one of the following conditions is satisfied:*

- 855 (a)  $\mathcal{H}_U$  is a local source of  $\mathcal{H}_V$ ; or
- 856 (b)  $\mathcal{H}_U$  has no causal effect on  $\mathcal{H}_V$ ; or
- 857 (c)  $V \subseteq U$ ,

858 *then  $\mathbb{P}^{\text{do}(U, \mathbb{Q})}(A)$  can be written in terms of  $\mathbb{P}$  and  $\mathbb{Q}$ .*

859 *Proof.* Condition (i) of Lemma D.3 is satisfied by hypothesis. If one of (a), (b) or (c) is satisfied, then  
860 trivially, condition (ii) of Lemma D.3 is also satisfied. The result now follows from Lemma D.3.  $\square$

861 The above is reminiscent of “valid adjustments” in the context of structural causal models [42, p.115,  
862 Proposition 6.41], and in fact contains the valid adjustments.

863 **E Counterfactuals**

864 There are various notions of counterfactuals in the literature. The one considered in the SCM  
 865 literature is the *interventional counterfactual*, which captures the notion of “what would have  
 866 happened if we intervened on the space, given some observations (that are possibly contradictory to  
 867 the intervention we imagine we would have done)”. Recently, *backtracking counterfactuals* have  
 868 also been integrated into the SCM framework [53]. This captures the notion of “what would have  
 869 happened if background conditions of the world had been different, given that the causal laws of  
 870 the system stay the same?” Finally, we note that in the potential outcomes framework, the random  
 871 variables representing “potential outcomes” that form the primitives of the framework can be directly  
 872 counterfactual.

873 Vanilla probability measures have just one argument, i.e. the event. Conditional measures and causal  
 874 kernels (in the sense of our Definition 2.2) have two arguments, the first being the outcome which  
 875 we either observe or force the occurrence of, and the second being the event in whose measure we  
 876 are interested. For both of the above concepts of counterfactuals, we need to go one step further and  
 877 consider three arguments. The first is the outcome which we observe, just like in conditioning, and  
 878 the last should be the event in whose measure we are interested. For interventional counterfactuals,  
 879 the second argument should be an outcome which we imagine to have forced the occurrence of given  
 880 that we observed the outcome of the first argument, and for backtracking counterfactuals, the second  
 881 argument should be an outcome which we imagine to have observed instead of the outcome in the  
 882 first argument which we actually observed.

883 From these principles, we tentatively propose to extend Definition 2.2 to account for *interventional*  
 884 *counterfactuals* as follows.

885 **Definition E.1.** A *causal space* is defined as the quadruple  $(\Omega, \mathcal{H}, \mathbb{P}, \mathbb{K})$ , where  $(\Omega, \mathcal{H}, \mathbb{P}) =$   
 886  $(\times_{t \in T} E_t, \otimes_{t \in T} \mathcal{E}_t, \mathbb{P})$  is a probability space and  $\mathbb{K} = \{K_{S, \mathcal{F}} : S \in \mathcal{P}(T), \mathcal{F} \text{ sub-}\sigma\text{-algebra of } \mathcal{H}\}$ ,  
 887 called the *causal mechanism*, is a collection of functions  $K_{S, \mathcal{F}} : \Omega \times \Omega \times \mathcal{H} \rightarrow [0, 1]$ , called the  
 888 *causal kernel on  $\mathcal{H}_S$  after observing  $\mathcal{F}$* , such that

- 889 (i) for each fixed  $\eta \in \Omega$  and  $A \in \mathcal{H}$ ,  $K_{S, \mathcal{F}}(\cdot, \eta, A)$  is measurable with respect to  $\mathcal{H}_S$ ;
- 890 (ii) for each fixed  $\omega \in \Omega$  and  $A \in \mathcal{H}$ ,  $K_{S, \mathcal{F}}(\omega, \cdot, A)$  is measurable with respect to  $\mathcal{F}$ ;
- 891 (iii) for each fixed pair  $(\omega, \eta) \in \Omega \times \Omega$ ,  $K_{S, \mathcal{F}}(\omega, \eta, \cdot)$  is a measure on  $\mathcal{H}$ ;
- 892 (iv) for all  $A \in \mathcal{H}$  and  $\omega, \eta \in \Omega$ ,

$$K_{\emptyset, \mathcal{F}}(\omega, \eta, A) = \mathbb{P}_{\mathcal{F}}(\eta, A);$$

- 893 (v) for all  $A \in \mathcal{H}_S$ , all  $B \in \mathcal{H}$  and all  $\omega, \eta \in \Omega$ ,

$$K_{S, \mathcal{F}}(\omega, \eta, A \cap B) = 1_A(\omega) K_S(\omega, \eta, B);$$

- 894 in particular, for  $A \in \mathcal{H}_S$ ,  $K_{S, \mathcal{F}}(\omega, \eta, A) = 1_A(\omega) K_{S, \mathcal{F}}(\omega, \eta, \Omega) = 1_A(\omega)$ ;

- 895 (vi) for all  $A \in \mathcal{H}$ ,  $\omega \in \Omega$  and sub- $\sigma$ -algebras  $\mathcal{F} \subseteq \mathcal{G} \subseteq \mathcal{H}$ ,

$$\mathbb{E}_{\mathcal{F}} [K_{S, \mathcal{G}}(\omega, \cdot, A)] = K_{S, \mathcal{F}}(\omega, \cdot, A).$$

896 Note that letting  $\mathcal{F} = \{\emptyset, \Omega\}$  trivially recovers the causal space as defined in Definition 2.2. Moreover,  
 897 letting  $S = \emptyset$ , we recover the conditional distribution given  $\mathcal{F}$ .

898 Recall that the one of the biggest philosophical differences between the SCM framework and  
 899 our proposed causal spaces (Definition 2.2) was the fact that SCMs start with the variables, the  
 900 structural equations and the noise distributions as the *primitive objects*, and the observational and  
 901 interventional distributions over the endogenous variables are *derived* from these, whereas causal  
 902 spaces take the observational and interventional distributions as the *primitive objects* (the latter  
 903 via causal kernels). Note that, in the above extended definition of causal spaces incorporating  
 904 interventional counterfactuals (Definition E.1), we applied the same principles, in that we treated  
 905 the observational distribution ( $\mathbb{P}$ ), interventional distributions ( $K_{S, \{\emptyset, \Omega\}}$ ) and the (interventional)  
 906 counterfactual distributions ( $K_{S, \mathcal{F}}$ ) as the primitive objects.

907 This differs significantly from the SCM framework, where again, the (interventional) counterfactual  
 908 distributions are *derived* from the structural equations, by first conditioning on the observed values of

909 the endogenous variables to get a modified (often Dirac) measure on the exogenous variables, then  
 910 intervening on some of the endogenous variables, deriving the measure on the rest of the endogenous  
 911 variables by propagating these through the same structural equations. We see the value in this  
 912 approach in that the (interventional) counterfactual distributions can be neatly derived from the same  
 913 primitive objects that are used to calculate the observational and interventional distribution. However,  
 914 we argue that this cannot be an *axiomatisation* of (interventional) counterfactual distributions in the  
 915 strictest sense, because it relies on assumptions. In particular, it strongly relies on the assumption that  
 916 the endogenous variables have no causal effect on the exogenous variables, and when this assumption  
 917 is violated, i.e. when there is a hidden mediator, calculation of (interventional) counterfactual  
 918 distributions is not possible. In contrast, Definition E.1 treat the (interventional) counterfactual  
 919 measures as the primitive objects, and does not impose any a priori assumptions about the system.

920 As mentioned in Section 5 of the main body of the paper, we leave further developments of this  
 921 interventional counterfactual causal space, as well as the definition of backtracking counterfactual  
 922 causal space, as essential future work.

## 923 F Proofs

924 **Theorem 2.6.** From Definition 2.3,  $\mathbb{P}^{\text{do}(U, \mathbb{Q})}$  is indeed a measure on  $(\Omega, \mathcal{H})$ , and  $\mathbb{K}^{\text{do}(U, \mathbb{Q}, \mathbb{L})}$  is indeed  
 925 a valid causal mechanism on  $(\Omega, \mathcal{H}, \mathbb{P}^{\text{do}(U, \mathbb{Q})})$ , i.e. they satisfy the axioms of Definition 2.2.

926 *Proof.* That  $\mathbb{P}^{\text{do}(U, \mathbb{Q})}$  is a measure on  $(\Omega, \mathcal{H})$  follows immediately from the usual construction of  
 927 measures from measures and transition probability kernels, see e.g. Çinlar [11, p.38, Theorem 6.3].  
 928 It remains to check that  $\mathbb{K}^{\text{do}(U, \mathbb{Q}, \mathbb{L})}$  is a valid causal mechanism in the sense of Definition 2.2.

929 (i) For all  $A \in \mathcal{H}$  and  $\omega \in \Omega$ ,

$$\begin{aligned} K_{\emptyset}^{\text{do}(U, \mathbb{Q}, \mathbb{L})}(\omega, A) &= \int L_{\emptyset}(\omega_{\emptyset}, d\omega'_U) K_U((\omega_{\emptyset}, \omega'_U), A) \\ &= \int \mathbb{Q}(d\omega') K_U(\omega', A) \\ &= \mathbb{P}^{\text{do}(U, \mathbb{Q})}(A), \end{aligned}$$

930 where we applied Axiom 2.2(i) to  $L_{\emptyset}$ .

931 (ii) For all  $A \in \mathcal{H}_S$  and  $B \in \mathcal{H}$ , we have, by Axiom 2.2(ii) using the fact that  $A \in \mathcal{H}_S \subseteq$   
 932  $\mathcal{H}_{S \cup U}$ ,

$$\begin{aligned} K_S^{\text{do}(U, \mathbb{Q}, \mathbb{L})}(\omega, A \cap B) &= \int L_{S \cap U}(\omega_{S \cap U}, d\omega'_U) K_{S \cup U}((\omega_{S \setminus U}, \omega'_U), A \cap B) \\ &= \int L_{S \cap U}(\omega_{S \cap U}, d\omega'_U) 1_A((\omega_{S \setminus U}, \omega'_U)) K_{S \cup U}((\omega_{S \setminus U}, \omega'_U), B) \\ &= \int L_{S \cap U}(\omega_{S \cap U}, d\omega'_U) 1_A((\omega_{S \setminus U}, \omega'_{S \cap U})) K_{S \cup U}((\omega_{S \setminus U}, \omega'_U), B), \end{aligned}$$

933 where, in going from the third line to the fourth, we split the  $\omega'_U$  in  $1_A((\omega_{S \setminus U}, \omega'_U))$  into  
 934 components  $(\omega'_{S \cap U}, \omega'_{U \setminus S})$  and notice that since  $A \in \mathcal{H}_S$ ,  $1_A$  does not depend on the  
 935 component  $\omega'_{U \setminus S}$ . Here, the map  $\omega'_{S \cap U} \mapsto 1_A((\omega_{S \setminus U}, \omega'_{S \cap U}))$  is  $\mathcal{H}_{S \cap U}$ -measurable, so  
 936 we can write it as the limit of an increasing sequence of positive  $\mathcal{H}_{S \cap U}$ -simple functions  
 937 (see Section A.1), say  $(f_n)_{n \in \mathbb{N}}$  with  $f_n = \sum_{i_n=1}^{m_n} b_{i_n} 1_{B_{i_n}}$ , where  $B_{i_n} \in \mathcal{H}_{S \cap U}$ . Like-  
 938 wise, the map  $\omega'_U \mapsto K_{S \cup U}((\omega_{S \setminus U}, \omega'_U), B)$  is  $\mathcal{H}_U$ -measurable, so we can write it as  
 939 the limit of an increasing sequence of positive  $\mathcal{H}_U$ -simple functions, say  $(g_n)_{n \in \mathbb{N}}$  with  
 940  $g_n = \sum_{j_n=1}^{l_n} c_{j_n} 1_{C_{j_n}}$ , where  $C_{j_n} \in \mathcal{H}_U$ . Hence

$$K_S^{\text{do}(U, \mathbb{Q}, \mathbb{L})}(\omega, A \cap B) = \int L_{S \cap U}(\omega_{S \cap U}, d\omega'_U) \left( \lim_{n \rightarrow \infty} f_n(\omega'_{S \cap U}) \right) \left( \lim_{n \rightarrow \infty} g_n(\omega'_U) \right).$$

941  
942

Since, for each  $\omega'_U$ , both of the limits exist by construction, namely the original measurable functions, we have that the product of the limits is the limit of the products:

$$K_S^{\text{do}(U, \mathbb{Q}, \mathbb{L})}(\omega, A \cap B) = \int L_{S \cap U}(\omega_{S \cap U}, d\omega'_U) \lim_{n \rightarrow \infty} (f_n(\omega'_{S \cap U}) g_n(\omega'_U)).$$

943  
944  
945

Here, since  $f_n$  and  $g_n$  were individually sequences of increasing functions, the pointwise products  $f_n g_n$  also form an increasing sequence of functions. Hence, we can apply the monotone convergence theorem to see that

$$\begin{aligned} & K_S^{\text{do}(U, \mathbb{Q}, \mathbb{L})}(\omega, A \cap B) \\ &= \lim_{n \rightarrow \infty} \int L_{S \cap U}(\omega_{S \cap U}, d\omega'_U) f_n(\omega'_{S \cap U}) g_n(\omega'_U) \\ &= \lim_{n \rightarrow \infty} \sum_{i_n=1}^{m_n} \sum_{j_n=1}^{l_n} b_{i_n} c_{j_n} \int L_{S \cap U}(\omega_{S \cap U}, d\omega'_U) 1_{B_{i_n}}(\omega'_{S \cap U}) 1_{C_{j_n}}(\omega'_U) \\ &= \lim_{n \rightarrow \infty} \sum_{i_n=1}^{m_n} \sum_{j_n=1}^{l_n} b_{i_n} c_{j_n} L_{S \cap U}(\omega_{S \cap U}, B_{i_n} \cap C_{j_n}) \\ &= \lim_{n \rightarrow \infty} \sum_{i_n=1}^{m_n} \sum_{j_n=1}^{l_n} b_{i_n} c_{j_n} 1_{B_{i_n}}(\omega_{S \cap U}) L_{S \cap U}(\omega_{S \cap U}, C_{j_n}) \\ &= \lim_{n \rightarrow \infty} \sum_{i_n=1}^{m_n} b_{i_n} 1_{B_{i_n}}(\omega_{S \cap U}) \sum_{j_n=1}^{l_n} c_{j_n} L_{S \cap U}(\omega_{S \cap U}, C_{j_n}) \\ &= \left( \lim_{n \rightarrow \infty} \sum_{i_n=1}^{m_n} b_{i_n} 1_{B_{i_n}}(\omega_{S \cap U}) \right) \left( \lim_{n \rightarrow \infty} \sum_{j_n=1}^{l_n} c_{j_n} L_{S \cap U}(\omega_{S \cap U}, C_{j_n}) \right) \\ &= \left( \lim_{n \rightarrow \infty} f_n(\omega_{S \cap U}) \right) \left( \lim_{n \rightarrow \infty} \int L_{S \cap U}(\omega_{S \cap U}, d\omega'_U) \sum_{j_n=1}^{l_n} c_{j_n} 1_{C_{j_n}}(\omega'_U) \right) \\ &= 1_A((\omega_{S \setminus U}, \omega_{S \cap U})) \int L_{S \cap U}(\omega_{S \cap U}, d\omega'_U) \lim_{n \rightarrow \infty} g_n(\omega'_U) \\ &= 1_A(\omega_S) \int L_{S \cap U}(\omega_{S \cap U}, d\omega'_U) K_{S \cup U}((\omega_{S \setminus U}, \omega'_U), B) \\ &= 1_A(\omega_S) K_S^{\text{do}(U, \mathbb{Q}, \mathbb{L})}(\omega_S, B) \end{aligned}$$

946  
947  
948  
949

where, from the fourth line to the fifth, we used Axiom 2.2(ii); from the sixth line to the seventh, we used that limit of the products is the product of the limits again, noting that both of the limits exist by construction; from the eighth line to the ninth, we used monotone convergence theorem again. This is the required result.

950

□

951 **Theorem C.3.** Let  $(\Omega, \mathcal{H}, \mathbb{P}, \mathbb{K}) = (\times_{t \in T} E_t, \otimes_{t \in T} \mathcal{E}_t, \mathbb{P}, \mathbb{K})$  be a causal space, and  $U \in \mathcal{P}(T)$  and  
952  $\mathbb{Q}$  a probability measure on  $(\Omega, \mathcal{H}_U)$ . Then after a hard intervention on  $\mathcal{H}_U$  via  $\mathbb{Q}$ , the intervention  
953 causal kernels  $K_S^{\text{do}(U, \mathbb{Q}, \text{hard})}$  are given by

$$K_S^{\text{do}(U, \mathbb{Q}, \text{hard})}(\omega, A) = K_S^{\text{do}(U, \mathbb{Q}, \text{hard})}(\omega_S, A) = \int \mathbb{Q}(d\omega'_{U \setminus S}) K_{S \cup U}((\omega_S, \omega'_{U \setminus S}), A).$$

954 *Proof.* We decompose  $\mathcal{H}_U$  as a product  $\sigma$ -algebra into  $\mathcal{H}_{S \cap U} \otimes \mathcal{H}_{U \setminus S}$ . Then events of the form  
955  $B \cap C$  with  $B \in \mathcal{H}_{S \cap U}$  and  $C \in \mathcal{H}_{U \setminus S}$  generate  $\mathcal{H}_U$ , so for fixed  $\omega_{S \cap U}$ , the measure  $L_{S \cap U}(\omega_{S \cap U}, \cdot)$   
956 is completely determined by  $L_{S \cap U}(\omega_{S \cap U}, B \cap C)$  for all  $B \in \mathcal{H}_{S \cap U}$ ,  $C \in \mathcal{H}_{U \setminus S}$ . But we have

$$L_{S \cap U}(\omega_{S \cap U}, B \cap C) = \delta_{\omega_{S \cap U}}(B) L_{S \cap U}(\omega_{S \cap U}, C) \quad \text{by Axiom 2.2(ii)}$$

$$= \delta_{\omega_{S \cap U}}(B) \mathbb{Q}(C),$$

957 since  $L_{S \cap U}$  is trivial and  $C \in \mathcal{H}_{U \setminus S}$ . So the measure  $L_{S \cap U}(\omega_{S \cap U}, \cdot)$  is a product measure of  $\delta_{\omega_{S \cap U}}$   
 958 and  $\mathbb{Q}$ . Hence, applying Fubini's theorem,

$$\begin{aligned} K_S^{\text{do}(U, \mathbb{Q}, \text{hard})}(\omega, A) &= \int L_{S \cap U}(\omega_{S \cap U}, d\omega'_U) K_{S \cup U}((\omega_{S \setminus U}, \omega'_U), A) \\ &= \int \int K_{S \cup U}((\omega_{S \setminus U}, \omega'_{S \cap U}, \omega'_{U \setminus S}), A) \delta_{\omega_{S \cap U}}(d\omega'_{S \cap U}) \mathbb{Q}(d\omega'_{U \setminus S}) \\ &= \int K_{S \cup U}((\omega_{S \setminus U}, \omega_{S \cap U}, \omega'_{U \setminus S}), A) \mathbb{Q}(d\omega'_{U \setminus S}) \\ &= \int \mathbb{Q}(d\omega'_{U \setminus S}) K_{S \cup U}((\omega_S, \omega'_{U \setminus S}), A), \end{aligned}$$

959 as required. □

960

961 **Theorem D.2.** Suppose we have a causal space  $(\Omega, \mathcal{H}, \mathbb{P}, \mathbb{K}) = (\times_{t \in T} E_t, \otimes_{t \in T} \mathcal{E}_t, \mathbb{P}, \mathbb{K})$ , and let  
 962  $U \in \mathcal{P}(T)$ .

963 (i) For any measure  $\mathbb{Q}$  on  $\mathcal{H}_U$  and any causal mechanism  $\mathbb{L}$  on  $(\Omega, \mathcal{H}_U, \mathbb{Q})$ , the causal kernel  
 964  $K_U^{\text{do}(U, \mathbb{Q}, \mathbb{L})} = K_U$  is a version of  $\mathbb{P}_{\mathcal{H}_U}^{\text{do}(U, \mathbb{Q})}$ , which means that  $\mathcal{H}_U$  is a global source  $\sigma$ -algebra  
 965 of the intervened causal space  $(\Omega, \mathcal{H}, \mathbb{P}^{\text{do}(U, \mathbb{Q})}, \mathbb{K}^{\text{do}(U, \mathbb{Q}, \mathbb{L})})$ .

966 (ii) Suppose  $V \in \mathcal{P}(T)$  with  $V \subseteq U$ . Suppose that the measure  $\mathbb{Q}$  on  $(\Omega, \mathcal{H}_U)$  factorises  
 967 over  $\mathcal{H}_V$  and  $\mathcal{H}_{U \setminus V}$ , i.e. for any  $A \in \mathcal{H}_V$  and  $B \in \mathcal{H}_{U \setminus V}$ ,  $\mathbb{Q}(A \cap B) = \mathbb{Q}(A)\mathbb{Q}(B)$ .  
 968 Then after a hard intervention on  $\mathcal{H}_U$  via  $\mathbb{Q}$ , the causal kernel  $K_V^{\text{do}(U, \mathbb{Q})}$  is a version of  
 969  $\mathbb{P}_V^{\text{do}(U, \mathbb{Q})}$ , which means that  $\mathcal{H}_V$  is a global source  $\sigma$ -algebra of the intervened causal space  
 970  $(\Omega, \mathcal{H}, \mathbb{P}^{\text{do}(U, \mathbb{Q})}, \mathbb{K}^{\text{do}(U, \mathbb{Q})})$ .

971 *Proof.* Suppose that  $f = \sum_{i=1}^m b_i 1_{B_i}$  is a  $\mathcal{H}_U$ -simple function, i.e. with  $B_i \in \mathcal{H}_U$  for  $i = 1, \dots, m$ .  
 972 Then for any  $B \in \mathcal{H}_U$ ,

$$\begin{aligned} \int_B f(\omega) \mathbb{P}^{\text{do}(U, \mathbb{Q})}(d\omega) &= \int_B \sum_{i=1}^m b_i 1_{B_i}(\omega) \mathbb{P}^{\text{do}(U, \mathbb{Q})}(d\omega) \\ &= \sum_{i=1}^m b_i \mathbb{P}^{\text{do}(U, \mathbb{Q})}(B \cap B_i) \\ &= \sum_{i=1}^m b_i \int \mathbb{Q}(d\omega) K_U(\omega, B \cap B_i) \quad \text{by the definition of } \mathbb{P}^{\text{do}(U, \mathbb{Q})} \\ &= \sum_{i=1}^m b_i \int \mathbb{Q}(d\omega) 1_{B \cap B_i}(\omega) \quad \text{by Axiom 2.2(ii)} \\ &= \int_B \sum_{i=1}^m b_i 1_{B_i}(\omega) \mathbb{Q}(d\omega) \\ &= \int_B f(\omega) \mathbb{Q}(d\omega). \end{aligned}$$

973 Now, for any  $\mathcal{H}_U$ -measurable map  $g : \Omega \rightarrow \mathbb{R}$ , we can write it as a limit of an increasing sequence of  
 974 positive  $\mathcal{H}_U$ -simple functions  $f_n$  (see Section A.1), so for any  $B \in \mathcal{H}_U$ ,

$$\begin{aligned} \int_B g(\omega) \mathbb{P}^{\text{do}(U, \mathbb{Q})}(d\omega) &= \int_B \lim_{n \rightarrow \infty} f_n(\omega) \mathbb{P}^{\text{do}(U, \mathbb{Q})}(d\omega) \\ &= \lim_{n \rightarrow \infty} \int_B f_n(\omega) \mathbb{P}^{\text{do}(U, \mathbb{Q})}(d\omega) \quad \text{by the monotone convergence theorem} \end{aligned}$$

$$\begin{aligned}
&= \lim_{n \rightarrow \infty} \int_B f_n(\omega) \mathbb{Q}(d\omega) && \text{by above} \\
&= \int_B \lim_{n \rightarrow \infty} f_n(\omega) \mathbb{Q}(d\omega) && \text{by the monotone convergence theorem} \\
&= \int_B g(\omega) \mathbb{Q}(d\omega).
\end{aligned}$$

975 We use this fact in the proof of both parts of this theorem.

976 (i) First note that we indeed have  $K_U^{\text{do}(U, \mathbb{Q}, \mathbb{L})} = K_U$ , by Remark C.1(a). For any  $A \in \mathcal{H}$ , the  
977 map  $\omega \mapsto K_U(\omega, A)$  is  $\mathcal{H}_U$ -measurable, so for any  $B \in \mathcal{H}_U$ ,

$$\begin{aligned}
\int_B K_U(\omega, A) \mathbb{P}^{\text{do}(U, \mathbb{Q})}(d\omega) &= \int_B K_U(\omega, A) \mathbb{Q}(d\omega) && \text{by above fact} \\
&= \int 1_B(\omega) K_U(\omega, A) \mathbb{Q}(d\omega) \\
&= \int K_U(\omega, A \cap B) \mathbb{Q}(d\omega) && \text{by Axiom 2.2(ii)} \\
&= \mathbb{P}^{\text{do}(U, \mathbb{Q})}(A \cap B) \\
&= \int 1_{A \cap B}(\omega) \mathbb{P}^{\text{do}(U, \mathbb{Q})}(d\omega) \\
&= \int 1_B(\omega) 1_A(\omega) \mathbb{P}^{\text{do}(U, \mathbb{Q})}(d\omega) \\
&= \int_B 1_A(\omega) \mathbb{P}^{\text{do}(U, \mathbb{Q})}(d\omega).
\end{aligned}$$

978 So  $K_U(\cdot, A) = K_U^{\text{do}(U, \mathbb{Q}, \mathbb{L})}(\cdot, A)$  is indeed a version of the conditional probability  
979  $\mathbb{P}_{\mathcal{H}_U}^{\text{do}(U, \mathbb{Q})}(A)$ , which means that  $\mathcal{H}_U$  is a global source of  $(\Omega, \mathcal{H}, \mathbb{P}^{\text{do}(U, \mathbb{Q})}, \mathbb{K}^{\text{do}(U, \mathbb{Q}, \mathbb{L})})$ .

980 (ii) For any  $A \in \mathcal{H}$ , the map  $\omega \mapsto K_V^{\text{do}(U, \mathbb{Q})}(\omega, A)$  is  $\mathcal{H}_V$ -measurable and hence  $\mathcal{H}_U$ -  
981 measurable, so for any  $B \in \mathcal{H}_V \subseteq \mathcal{H}_U$ ,

$$\begin{aligned}
&\int_B K_V^{\text{do}(U, \mathbb{Q})}(\omega_V, A) \mathbb{P}^{\text{do}(U, \mathbb{Q})}(d\omega_V) \\
&= \int_B K_V^{\text{do}(U, \mathbb{Q})}(\omega_V, A) \mathbb{Q}(d\omega_V) && \text{by above fact} \\
&= \int K_V^{\text{do}(U, \mathbb{Q})}(\omega_V, A \cap B) \mathbb{Q}(d\omega_V) && \text{by Axiom 2.2(ii)} \\
&= \int \int \mathbb{Q}(d\omega'_{U \setminus V}) K_U((\omega_V, \omega'_{U \setminus V}), A \cap B) \mathbb{Q}(d\omega_V) \\
&= \int K_U(\omega_U, A \cap B) \mathbb{Q}(d\omega_U) \\
&= \int_B 1_A(\omega) \mathbb{P}^{\text{do}(U, \mathbb{Q})}(d\omega).
\end{aligned}$$

982 where, in going from the third line to the fourth, we used Theorem C.3, and to go  
983 from the fourth line to the fifth, we used the hypothesis that  $\mathbb{Q}$  factorises over  $\mathcal{H}_V$  and  
984  $\mathcal{H}_{U \setminus V}$ , meaning  $\mathbb{Q}(d\omega_{U \setminus V}) \mathbb{Q}(d\omega_V) = \mathbb{Q}(d\omega_U)$ . So  $K_V^{\text{do}(U, \mathbb{Q})}(\omega, A)$  is indeed a version  
985 of the conditional probability  $\mathbb{P}_{\mathcal{H}_V}^{\text{do}(U, \mathbb{Q})}(A)$ , which means that  $\mathcal{H}_V$  is a global source of  
986  $(\Omega, \mathcal{H}, \mathbb{P}^{\text{do}(U, \mathbb{Q})}, \mathbb{K}^{\text{do}(U, \mathbb{Q})})$ .

987 □

988 **Lemma C.4.** Let  $(\Omega, \mathcal{H}, \mathbb{P}, \mathbb{K}) = (\times_{t \in T} E_t, \otimes_{t \in T} \mathcal{E}_t, \mathbb{P}, \mathbb{K})$  be a causal space, and  $U \in \mathcal{P}(T)$ ,  $\mathbb{Q}$  a  
989 probability measure on  $(\Omega, \mathcal{H}_U)$  and  $\mathbb{L} = \{L_V : V \in \mathcal{P}(U)\}$  a causal mechanism on  $(\Omega, \mathcal{H}_U, \mathbb{Q})$ .  
990 Suppose we intervene on  $\mathcal{H}_U$  via  $(\mathbb{Q}, \mathbb{L})$ .

- 991 (i) For  $A \in \mathcal{H}_U$  and  $V \in \mathcal{P}(T)$  with  $V \cap U = \emptyset$ ,  $\mathcal{H}_V$  has no causal effect on  $A$  (c.f. Definition  
992 B.1(i)) in the intervention causal space  $(\Omega, \mathcal{H}, \mathbb{P}^{\text{do}(U, \mathbb{Q})}, \mathbb{K}^{\text{do}(U, \mathbb{Q}, \mathbb{L})})$ , i.e. events in the  $\sigma$ -  
993 algebra  $\mathcal{H}_U$  on which intervention took place are not causally affected by  $\sigma$ -algebras outside  
994  $\mathcal{H}_U$ .
- 995 (ii) Again, let  $V \in \mathcal{P}(T)$  with  $V \cap U = \emptyset$ , and also let  $A \in \mathcal{H}$  be any event. If, in the original  
996 causal space,  $\mathcal{H}_V$  had no causal effect on  $A$ , then in the intervention causal space,  $\mathcal{H}_V$  has  
997 no causal effect on  $A$  either.
- 998 (iii) Now let  $V \in \mathcal{P}(T)$ ,  $A \in \mathcal{H}$  any event and suppose that the intervention on  $\mathcal{H}_U$  via  $\mathbb{Q}$  is  
999 hard. Then if  $\mathcal{H}_V$  had no causal effect on  $A$  in the original causal space, then  $\mathcal{H}_V$  has no  
1000 causal effect on  $A$  in the intervention causal space either.

1001 *Proof.* (i) Take any  $S \in \mathcal{P}(T)$ . See that

$$\begin{aligned}
K_S^{\text{do}(U, \mathbb{Q}, \mathbb{L})}(\omega, A) &= \int L_{S \cap U}(\omega_{S \cap U}, d\omega'_U) K_{S \cup U}((\omega_{S \setminus U}, \omega'_U), A) \\
&= \int L_{S \cap U}(\omega_{S \cap U}, d\omega'_U) 1_A(\omega'_U) \\
&= \int L_{S \cap U}(\omega_{S \cap U}, d\omega'_U) K_{(S \setminus V) \cup U}((\omega_{(S \setminus V) \setminus U}, \omega'_U), A) \\
&= \int L_{(S \setminus V) \cap U}(\omega_{(S \setminus V) \cap U}, d\omega'_U) K_{(S \setminus V) \cup U}((\omega_{(S \setminus V) \setminus U}, \omega'_U), A) \\
&= K_{S \setminus V}^{\text{do}(U, \mathbb{Q}, \mathbb{L})}(\omega, A)
\end{aligned}$$

1002 where, in going from the first line to the second and from the second line to the third, we  
1003 used the fact that  $A \in \mathcal{H}_U$ , and in going from the third line to the fourth, we applied the fact  
1004 that  $(S \setminus V) \cap U = S \cap U$  since  $V \cap U = \emptyset$ . Since  $S \in \mathcal{P}(T)$  was arbitrary,  $\mathcal{H}_V$  has no  
1005 causal effect on  $A$  in the intervention causal space.

1006 (ii) Take any  $S \in \mathcal{P}(T)$ . See that

$$\begin{aligned}
K_S^{\text{do}(U, \mathbb{Q}, \mathbb{L})}(\omega, A) &= \int L_{S \cap U}(\omega_{S \cap U}, d\omega'_U) K_{S \cup U}((\omega_{S \setminus U}, \omega'_U), A) \\
&= \int L_{S \cap U}(\omega_{S \cap U}, d\omega'_U) K_{(S \cup U) \setminus V}((\omega_{(S \setminus V) \setminus U}, \omega'_U), A) \\
&= \int L_{(S \setminus V) \cap U}(\omega_{(S \setminus V) \cap U}, d\omega'_U) K_{(S \setminus V) \cup U}((\omega_{(S \setminus V) \setminus U}, \omega'_U), A) \\
&= K_{S \setminus V}^{\text{do}(U, \mathbb{Q}, \mathbb{L})}(\omega, A)
\end{aligned}$$

1007 where, in going from the first line to the second, we used the fact that  $\mathcal{H}_V$  has no causal  
1008 effect on  $A$  in the original causal space, and in going from the second line to the third, we  
1009 used  $U \cap V = \emptyset$ , which gives us  $S \cap U = (S \setminus V) \cap U$  and  $(S \cup U) \setminus V = (S \setminus V) \cup U$ .  
1010 Since  $S \in \mathcal{P}(T)$  was arbitrary,  $\mathcal{H}_V$  has no causal effect on  $A$  in the intervention causal  
1011 space.

1012 (iii) Take any  $S \in \mathcal{P}(T)$ . Apply Theorem C.3 to see that

$$\begin{aligned}
K_S^{\text{do}(U, \mathbb{Q}, \text{hard})}(\omega, A) &= \int \mathbb{Q}(d\omega'_{U \setminus S}) K_{S \cup U}((\omega_S, \omega'_{U \setminus S}), A) \\
&= \int \mathbb{Q}(d\omega'_{U \setminus S}) K_{(S \cup U) \setminus V}((\omega_S, \omega'_{U \setminus S}), A) && \text{Def. B.1(i)} \\
&= \int \mathbb{Q}(d\omega'_{U \setminus S}) K_{((S \setminus V) \cup U) \setminus V}((\omega_S, \omega'_{U \setminus S}), A) \\
&= \int \mathbb{Q}(d\omega'_{U \setminus S}) K_{(S \setminus V) \cup U}((\omega_S, \omega'_{U \setminus S}), A) && \text{Def. B.1(i)} \\
&= \int \mathbb{Q}(d\omega'_{U \setminus (S \setminus V)}) K_{(S \setminus V) \cup U}((\omega_{S \setminus V}, \omega'_{U \setminus (S \setminus V)}), A)
\end{aligned}$$

$$= K_{S \setminus V}^{\text{do}(U, \mathbb{Q})}(\omega, A),$$

1013 where, in going from the second line to the third, we used that  $(S \cup U) \setminus V = ((S \setminus V) \cup U) \setminus V$ .  
 1014 Since  $S \in \mathcal{P}(T)$  was arbitrary,  $\mathcal{H}_V$  has no causal effect on  $A$  in the intervention causal  
 1015 space. □

1016

1017 **Lemma C.5.** Let  $(\Omega, \mathcal{H}, \mathbb{P}, \mathbb{K}) = (\times_{t \in T} E_t, \otimes_{t \in T} \mathcal{E}_t, \mathbb{P}, \mathbb{K})$  be a causal space, and  $U \in \mathcal{P}(T)$ . For  
 1018 an event  $A \in \mathcal{H}$ , if  $\mathcal{H}_U$  has a dormant causal effect on  $A$  in the original causal space, then there  
 1019 exists a hard intervention and a subset  $V \subseteq U$  such that in the intervention causal space,  $\mathcal{H}_V$  has an  
 1020 active causal effect on  $A$ .

1021 *Proof.* That  $\mathcal{H}_U$  has a dormant causal effect on  $A$  tells us that  $K_U(\omega, A) = \mathbb{P}(A)$  for all  $\omega \in \Omega$ , but  
 1022 there exists some  $S \in \mathcal{P}(T)$  and some  $\omega_0 \in \Omega$  such that  $K_S(\omega_0, A) \neq K_{S \setminus U}(\omega_0, A)$ . We must have  
 1023  $S \cap U \neq \emptyset$ , since otherwise  $S \setminus U = S$  and we cannot possibly have  $K_S(\omega_0, A) \neq K_{S \setminus U}(\omega_0, A)$ .  
 1024 Then we hard-intervene on  $\mathcal{H}_{S \setminus U}$  with the Dirac measure on  $\omega_0$ . Then apply Theorem C.3 to see that

$$\begin{aligned} K_{S \cap U}^{\text{do}(S \setminus U, \delta_{\omega_0}, \text{hard})}((\omega_0)_{U \cap S}, A) &= \int \delta_{\omega_0}(d\omega'_{S \setminus U}) K_S((\omega_0)_{U \cap S}, \omega'_{S \setminus U}, A) \\ &= K_S(\omega_0, A) \\ &\neq K_{S \setminus U}(\omega_0, A) \end{aligned}$$

1025 Note that the intervention measure on  $A$  is equal to  $K_{S \setminus U}(\omega_0, A)$ :

$$\mathbb{P}^{\text{do}(S \setminus U, \delta_{\omega_0})}(A) = \int \delta_{\omega_0}(d\omega'_{S \setminus U}) K_{S \setminus U}(\omega', A) = K_{S \setminus U}(\omega_0, A).$$

1026 Putting these together, we have

$$K_{S \cap U}^{\text{do}(S \setminus U, \delta_{\omega_0}, \text{hard})}(\omega_0, A) \neq \mathbb{P}^{\text{do}(S \setminus U, \delta_{\omega_0})}(A),$$

1027 i.e. in the intervention causal space  $(\Omega, \mathcal{H}, \mathbb{P}^{\text{do}(S \setminus U, \delta_{\omega_0})}, K_{S \cap U}^{\text{do}(S \setminus U, \delta_{\omega_0}, \text{hard})})$ ,  $\mathcal{H}_{S \cap U}$  has an active  
 1028 causal effect on  $A$ . □

1029 **Lemma C.6.** Let  $(\Omega, \mathcal{H}, \mathbb{P}, \mathbb{K}) = (\times_{t \in T} E_t, \otimes_{t \in T} \mathcal{E}_t, \mathbb{P}, \mathbb{K})$  be a causal space, and  $U, V \in \mathcal{P}(T)$ .  
 1030 For an event  $A \in \mathcal{H}$ , suppose that  $\mathcal{H}_U$  has no causal effect on  $A$  given  $\mathcal{H}_V$  (see Definition B.4).  
 1031 Then after an intervention on  $\mathcal{H}_V$  via any  $(\mathbb{Q}, \mathbb{L})$ ,  $\mathcal{H}_{U \setminus V}$  has no causal effect on  $A$ .

1032 *Proof.* Take any probability measure  $\mathbb{Q}$  on  $(\Omega, \mathcal{H}_V)$  and any causal mechanism  $\mathbb{L}$  on  $(\Omega, \mathcal{H}_V, \mathbb{Q})$ .  
 1033 Then see that, for any  $S \in \mathcal{P}(T)$  and all  $\omega \in \Omega$ ,

$$\begin{aligned} K_S^{\text{do}(V, \mathbb{Q}, \mathbb{L})}(\omega, A) &= \int L_{S \cap V}(\omega_{S \cap V}, d\omega'_V) K_{S \cup V}((\omega_{S \setminus V}, \omega'_V), A) \\ &= \int L_{S \cap V}(\omega_{S \cap V}, d\omega'_V) K_{(S \cup V) \setminus (U \setminus V)}((\omega_{S \setminus (U \cup V)}, \omega'_V), A) \\ &= \int L_{(S \setminus (U \setminus V)) \cap V}(\omega_{(S \setminus (U \setminus V)) \cap V}, d\omega'_V) K_{(S \setminus (U \setminus V)) \cup V}((\omega_{S \setminus (U \cup V)}, \omega'_V), A) \\ &= K_{S \setminus (U \setminus V)}^{\text{do}(V, \mathbb{Q}, \mathbb{L})}(\omega, A), \end{aligned}$$

1034 where, in going from the first line to the second, we used the fact that  $\mathcal{H}_U$  has no causal effect on  $A$   
 1035 given  $\mathcal{H}_V$ , and in going from the second line to the third, we used identities  $S \cap V = (S \setminus (U \setminus V)) \cap V$   
 1036 and  $(S \cup V) \setminus (U \setminus V) = (S \setminus (U \setminus V)) \cup V$ . Since  $S \in \mathcal{P}(T)$  was arbitrary, we have that  $\mathcal{H}_{U \setminus V}$   
 1037 has no causal effect on  $A$  in the intervention causal space. □

1038 **Theorem C.7.** Let  $(\Omega, \mathcal{H}, \mathbb{P}, \mathbb{K}) = (\times_{t \in T} E_t, \otimes_{t \in T} \mathcal{E}_t, \mathbb{P}, \mathbb{K})$  be a causal space, where the index set  $T$   
 1039 can be written as  $T = W \times \tilde{T}$ , with  $W$  representing time and  $\mathbb{K}$  respecting time. Take any  $U \in \mathcal{P}(T)$   
 1040 and any probability measure  $\mathbb{Q}$  on  $\mathcal{H}_U$ . Then the intervention causal mechanism  $\mathbb{K}^{\text{do}(U, \mathbb{Q}, \text{hard})}$  also  
 1041 respects time.



1042 *Proof.* Take any  $w_1, w_\otimes \in W$  with  $w_1 < w_2$ . Since  $\mathbb{K}$  respects time, we have that  $\mathcal{H}_{w_2 \times \tilde{T}}$  has no  
1043 causal effect on  $\mathcal{H}_{w_1 \times \tilde{T}}$  in the original causal space. To show that  $\mathcal{H}_{w_2 \times \tilde{T}}$  has no causal effect on  
1044  $\mathcal{H}_{w_1 \times \tilde{T}}$  after a hard intervention on  $\mathcal{H}_U$  via  $\mathbb{Q}$ , take any  $S \in \mathcal{P}(T)$  and any event  $A \in \mathcal{H}_{w_1 \times \tilde{T}}$ . Then  
1045 using Theorem C.3,

$$\begin{aligned}
& K_S^{\text{do}(U, \mathbb{Q}, \text{hard})}(\omega, A) \\
&= \int \mathbb{Q}(d\omega') K_{S \cup U}((\omega_S, \omega'_{U \setminus S}), A) \\
&= \int \mathbb{Q}(d\omega') K_{(S \cup U) \setminus \mathcal{H}_{w_2 \times \tilde{T}}}((\omega_{S \setminus \mathcal{H}_{w_2 \times \tilde{T}}}, \omega'_{U \setminus (S \cup \mathcal{H}_{w_2 \times \tilde{T}})}), A) \\
&= \int \mathbb{Q}(d\omega') K_{((S \cup U) \setminus \mathcal{H}_{w_2 \times \tilde{T}}) \cup (U \cap \mathcal{H}_{w_2 \times \tilde{T}})}((\omega_{S \setminus \mathcal{H}_{w_2 \times \tilde{T}}}, \omega'_{(U \setminus (S \cup \mathcal{H}_{w_2 \times \tilde{T}})) \cup (U \cap \mathcal{H}_{w_2 \times \tilde{T}})}), A) \\
&= \int \mathbb{Q}(d\omega') K_{(S \setminus \mathcal{H}_{w_2 \times \tilde{T}}) \cup U}((\omega_{S \setminus \mathcal{H}_{w_2 \times \tilde{T}}}, \omega'_{U \setminus (S \setminus \mathcal{H}_{w_2 \times \tilde{T}})}), A) \\
&= K_{S \setminus \mathcal{H}_{w_2 \times \tilde{T}}}^{\text{do}(U, \mathbb{Q}, \text{hard})}(\omega, A)
\end{aligned}$$

1046 where, from the second line to the third, we used the fact that  $\mathcal{H}_{w_2 \times \tilde{T}}$  has no causal effect on  
1047  $A$ , from the third line to the fourth we used the fact that  $U \cap \mathcal{H}_{w_2 \times \tilde{T}}$  has no causal effect on  
1048  $A$  (by Remark B.2(e) and Remark B.2(g), and from the fourth line to the fifth, we used that  
1049  $((S \cup U) \setminus \mathcal{H}_{w_2 \times \tilde{T}}) \cup (U \cap \mathcal{H}_{w_2 \times \tilde{T}}) = (S \setminus \mathcal{H}_{w_2 \times \tilde{T}}) \cup U$  and  $(U \setminus (S \cup \mathcal{H}_{w_2 \times \tilde{T}})) \cup (U \cap \mathcal{H}_{w_2 \times \tilde{T}}) =$   
1050  $U \setminus (S \setminus \mathcal{H}_{w_2 \times \tilde{T}})$ . Since  $S \in \mathcal{P}(T)$  was arbitrary, we have that  $\mathcal{H}_{w_2 \times \tilde{T}}$  has no causal effect on  $A$   
1051 (Definition B.1(i)). Since  $A \in \mathcal{H}_{w_1 \times \tilde{T}}$  was arbitrary,  $\mathcal{H}_{w_2 \times \tilde{T}}$  has no causal effect on  $\mathcal{H}_{w_1 \times \tilde{T}}$ , and so  
1052  $\mathbb{K}^{\text{do}(U, \mathbb{Q}, \text{hard})}$  respects time.  $\square$
